# Supplementary material for: Copper-catalyzed tandem Ullmann type C–N coupling and dehydrative cyclization: synthesis of imidazo[1,2-c]quinazolines
Source: Royal Society of Chemistry journal article supplement (doi:10.1039/c5ob02469b), 2015-12-22

## *Supporting Information*

### **Copper-catalyzed Tandem Ullmann type C–N Coupling and Dehydrative Cyclization: Synthesis of Imidazo[1,2-*c*]quinazolines**

Nitesh Kumar Nandwana, Shiv Dhiman, Ganesh M. Shelke, Anil Kumar\*

*\*Department of Chemistry, Birla Institute of Technology and Science, Pilani, 333031, India*

*E-mail: anilkumar@pilani.bits-pilani.ac.in*

Copies of  $^1\text{H}$  NMR and  $^{13}\text{C}$  NMR spectra of **3a-q** and **4a-c**

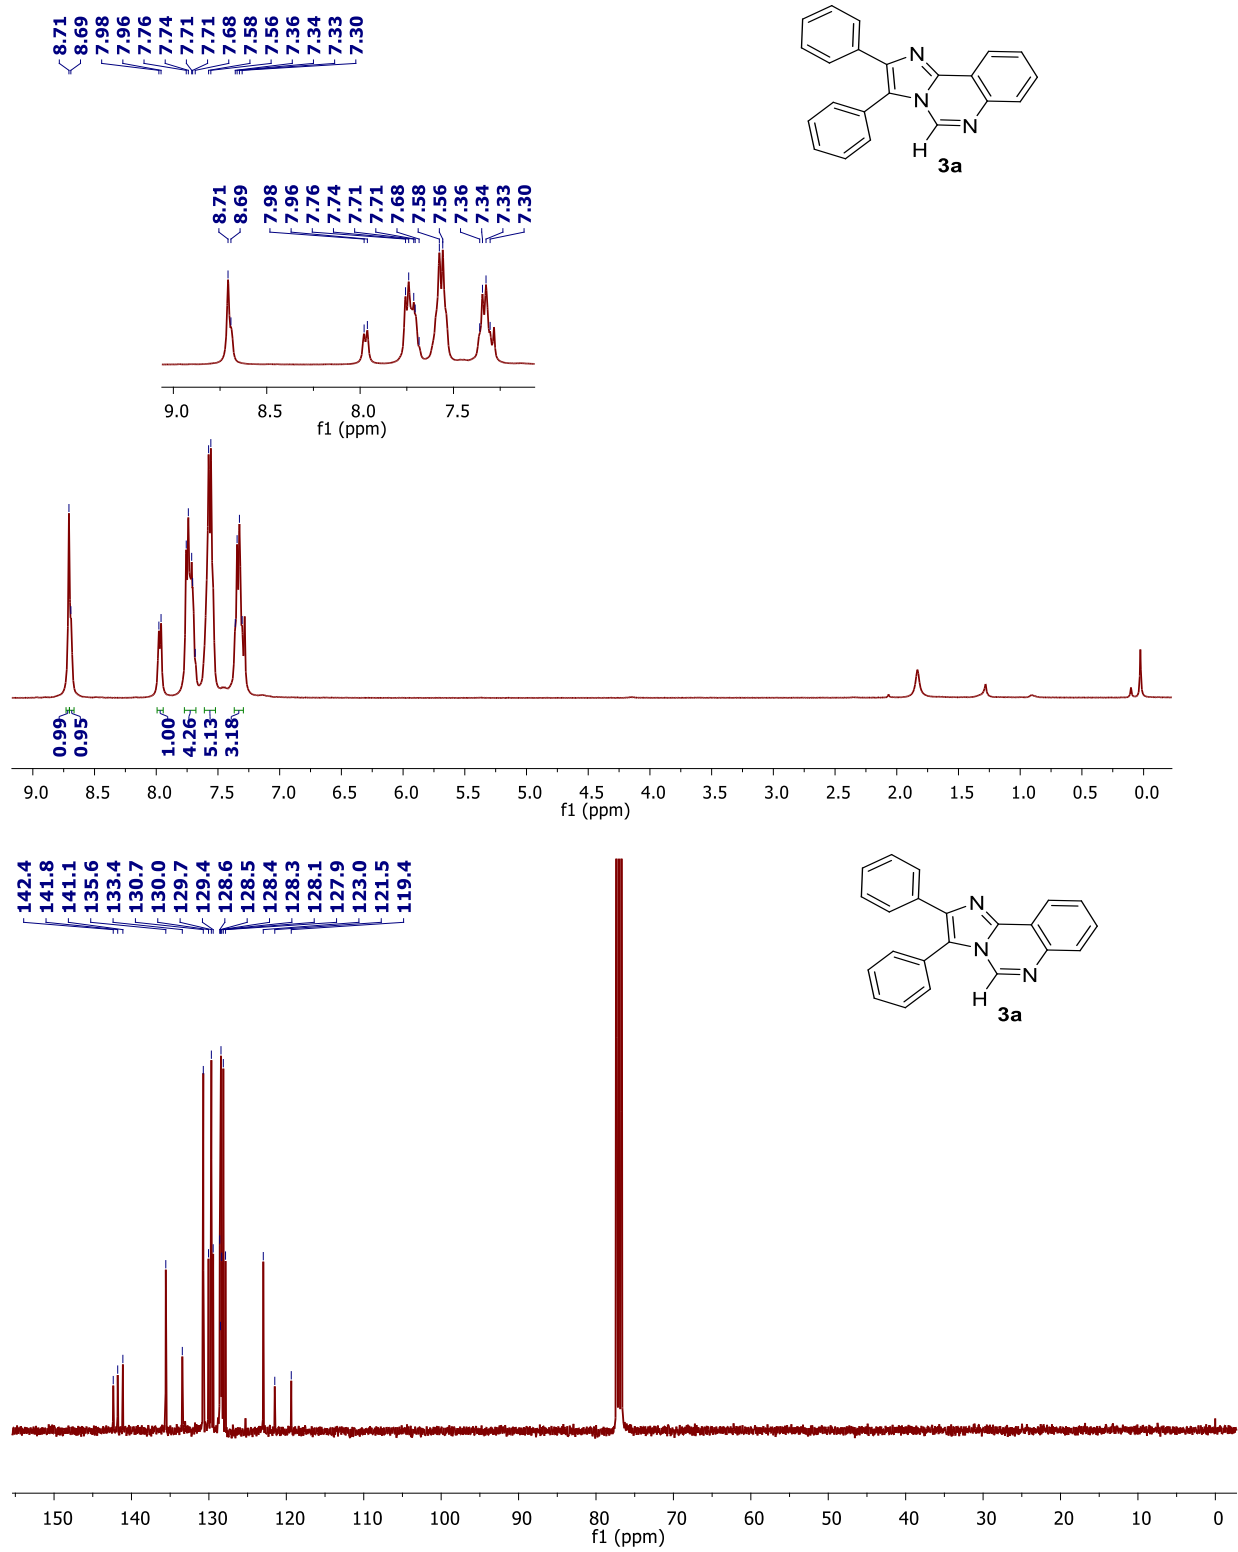

8.70  
8.69  
8.68  
8.68  
7.97  
7.96  
7.95  
7.95  
7.72  
7.72  
7.71  
7.70  
7.70  
7.69  
7.70  
7.69  
7.69  
7.66  
7.66  
7.63  
7.43  
7.42  
7.41  
7.39  
7.37  
7.28  
7.17  
7.15

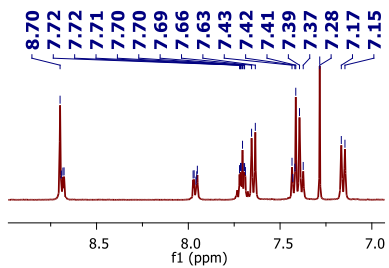

2.50  
2.37

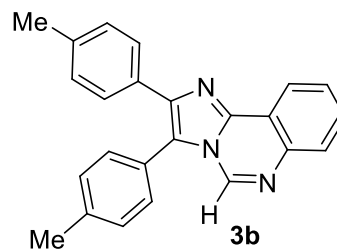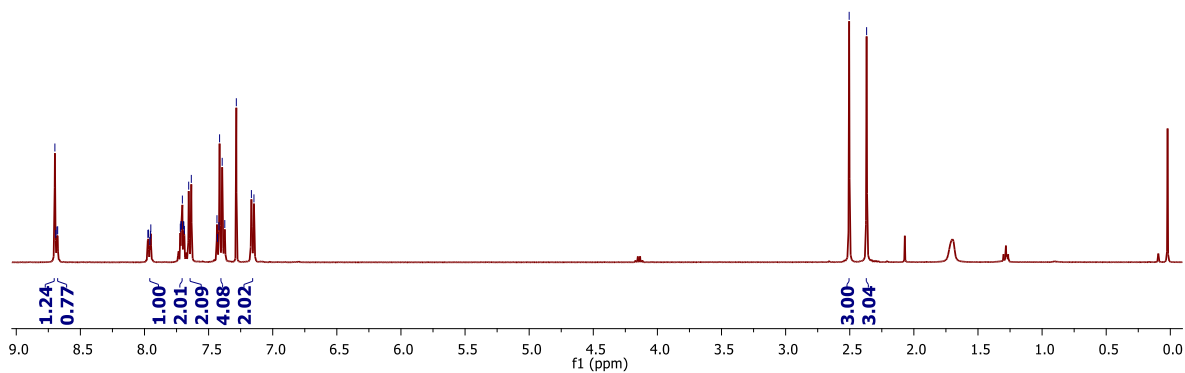

142.2  
141.7  
141.1  
139.4  
137.6  
135.7  
130.6  
130.6  
130.4  
129.9  
129.1  
128.5  
128.3  
127.9  
125.5  
122.9  
121.2  
119.4

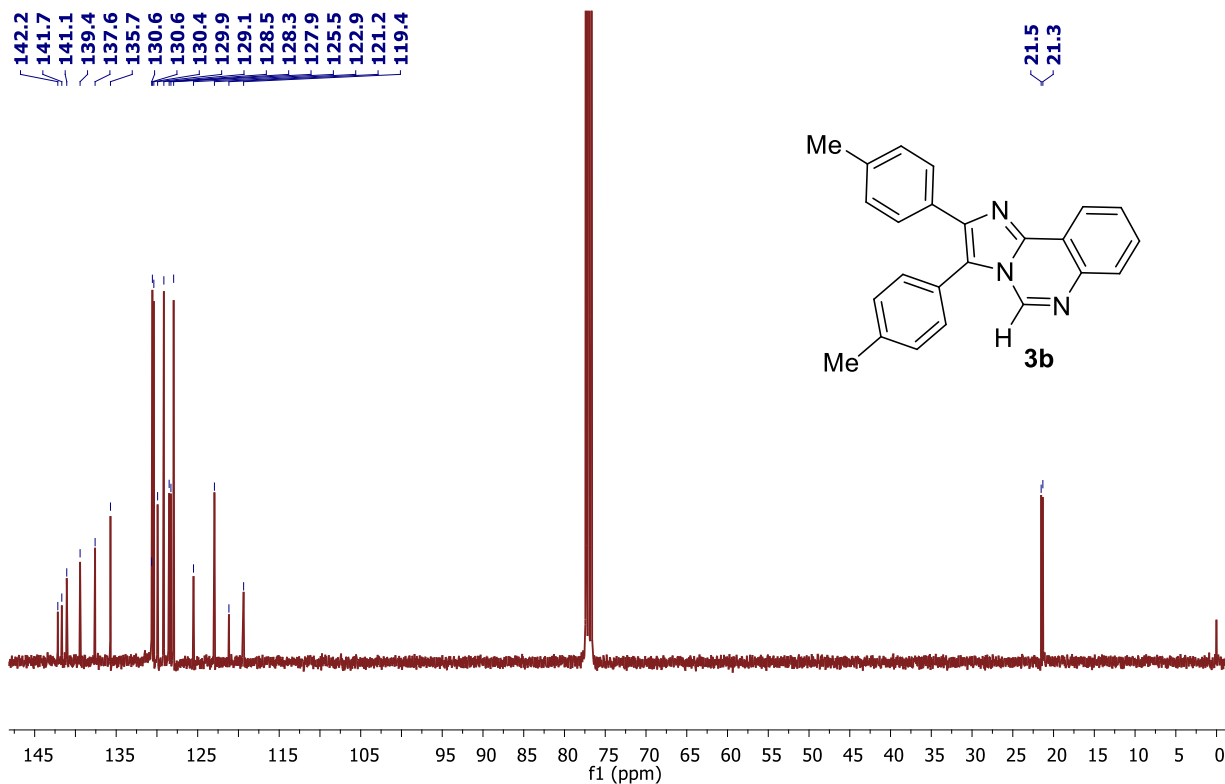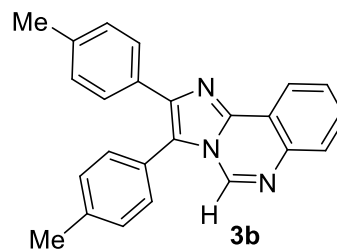

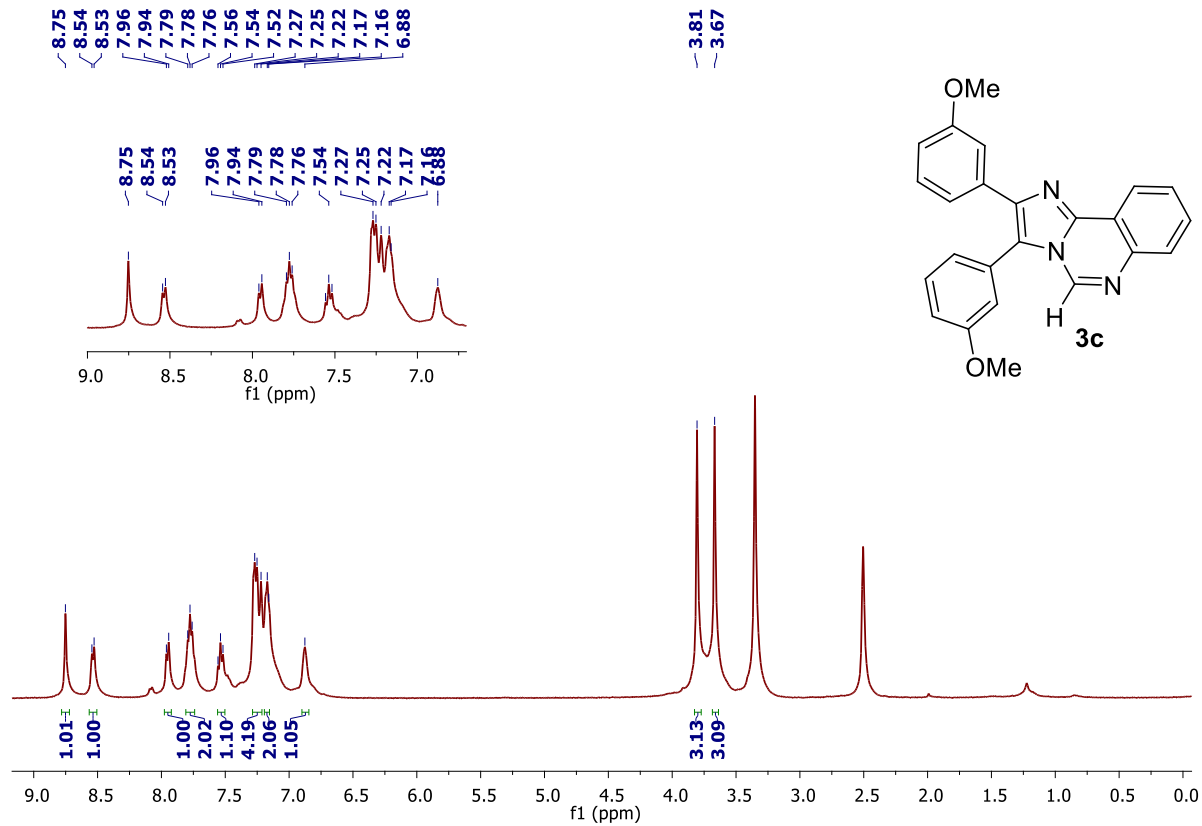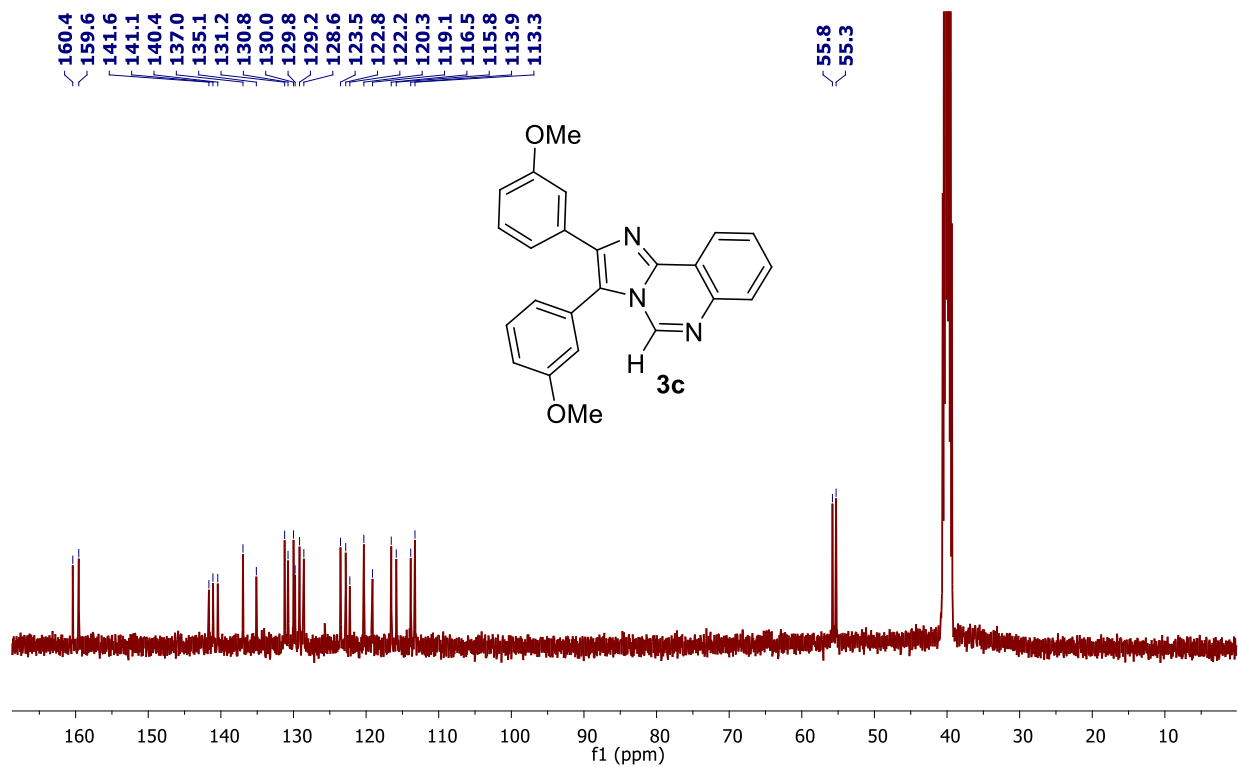

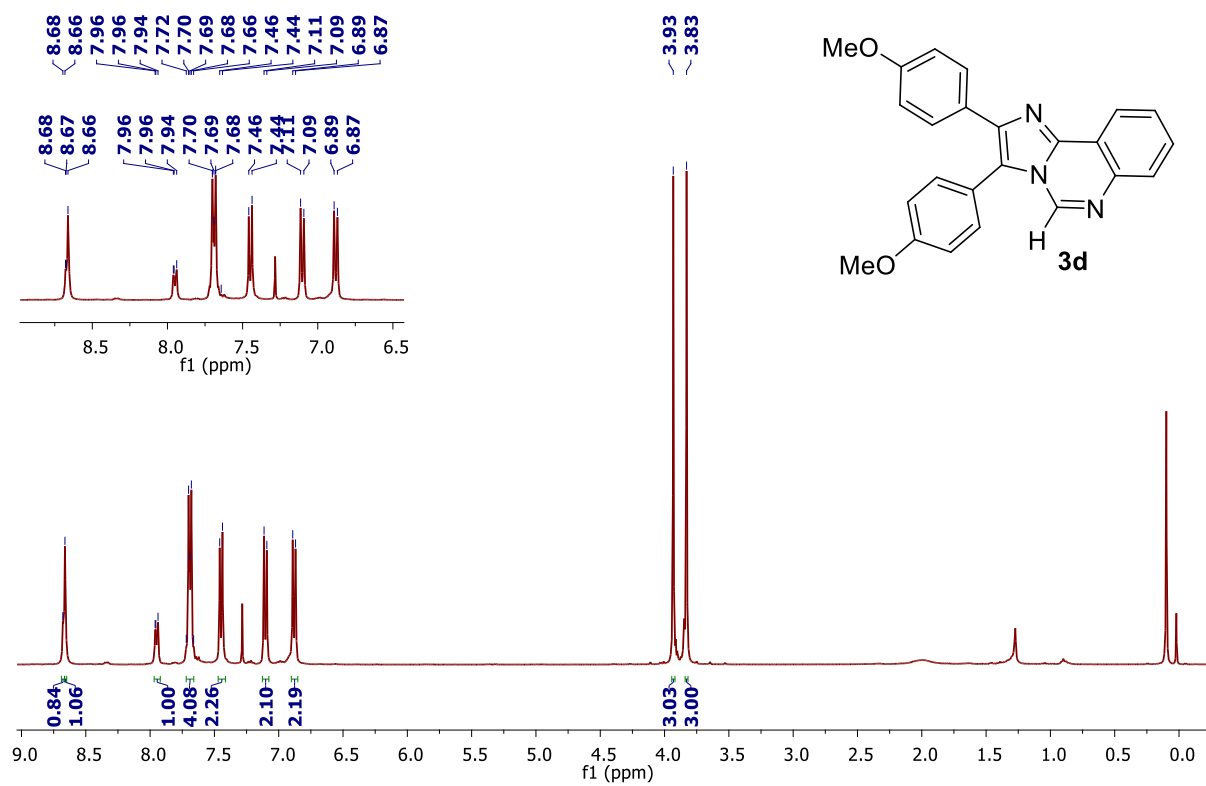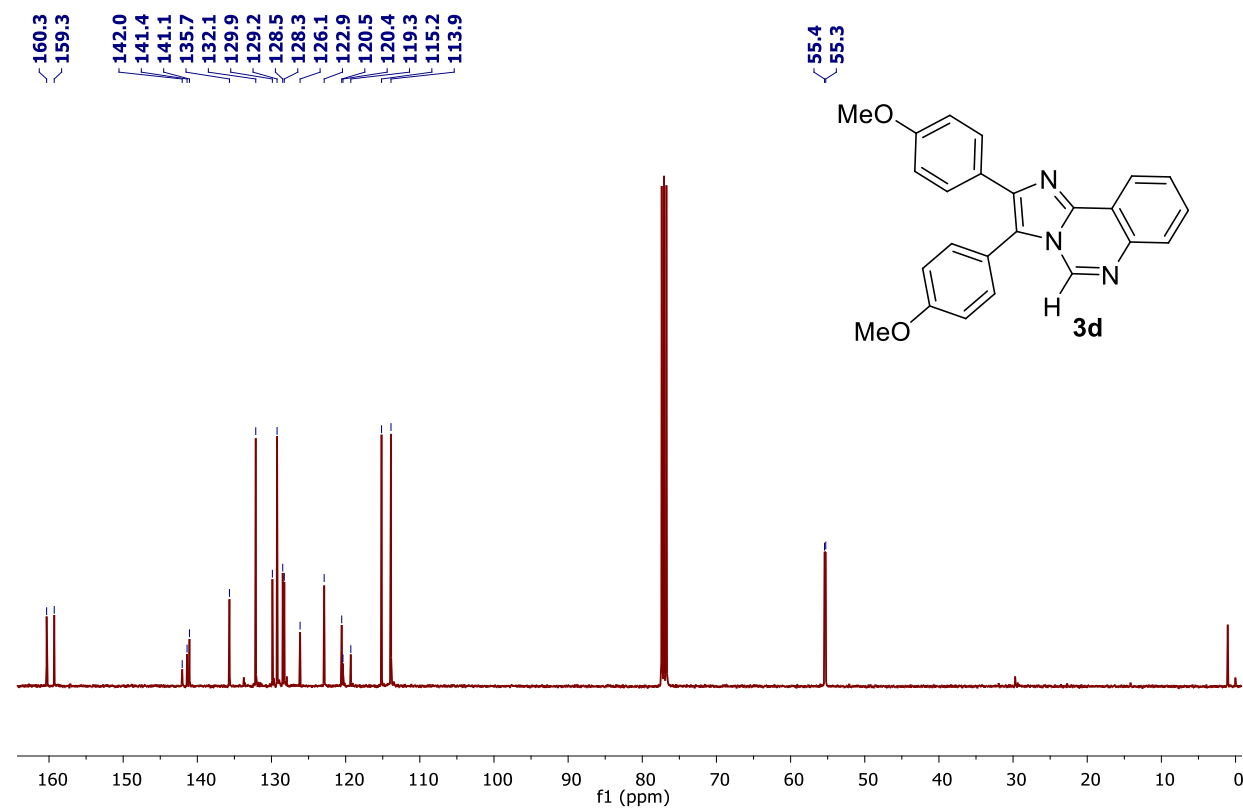

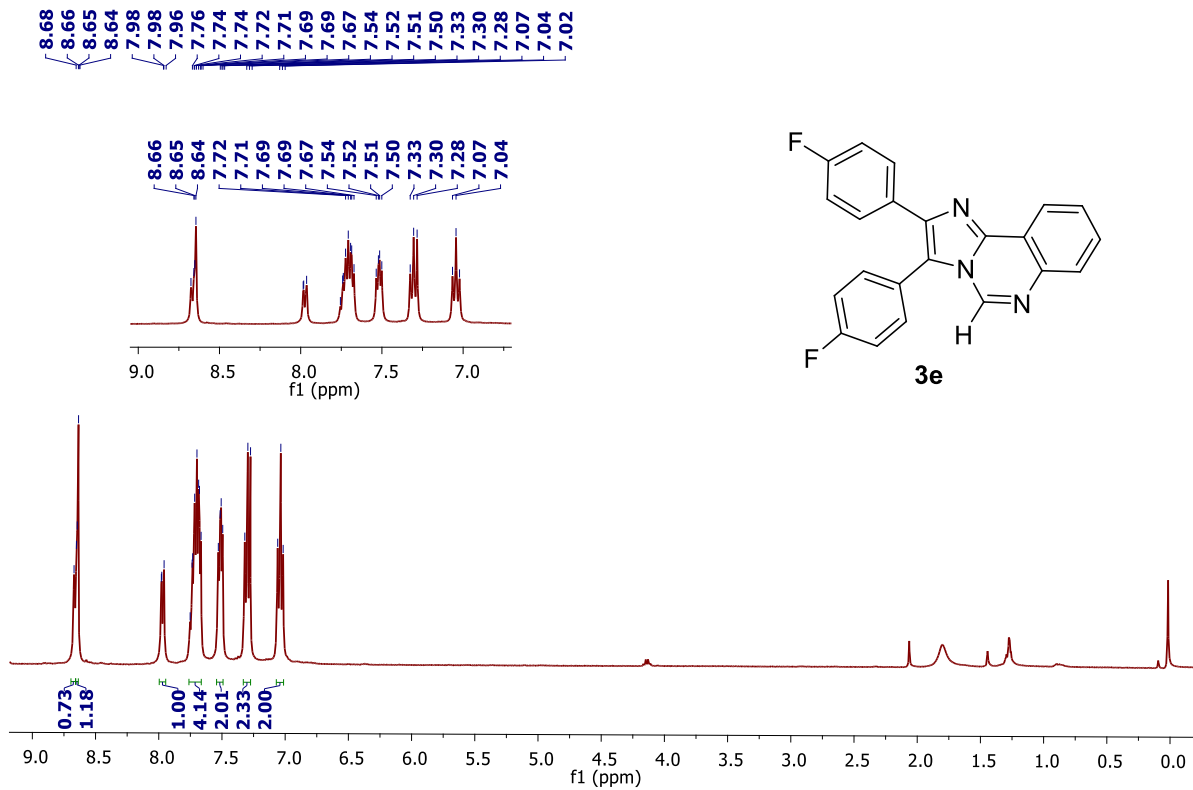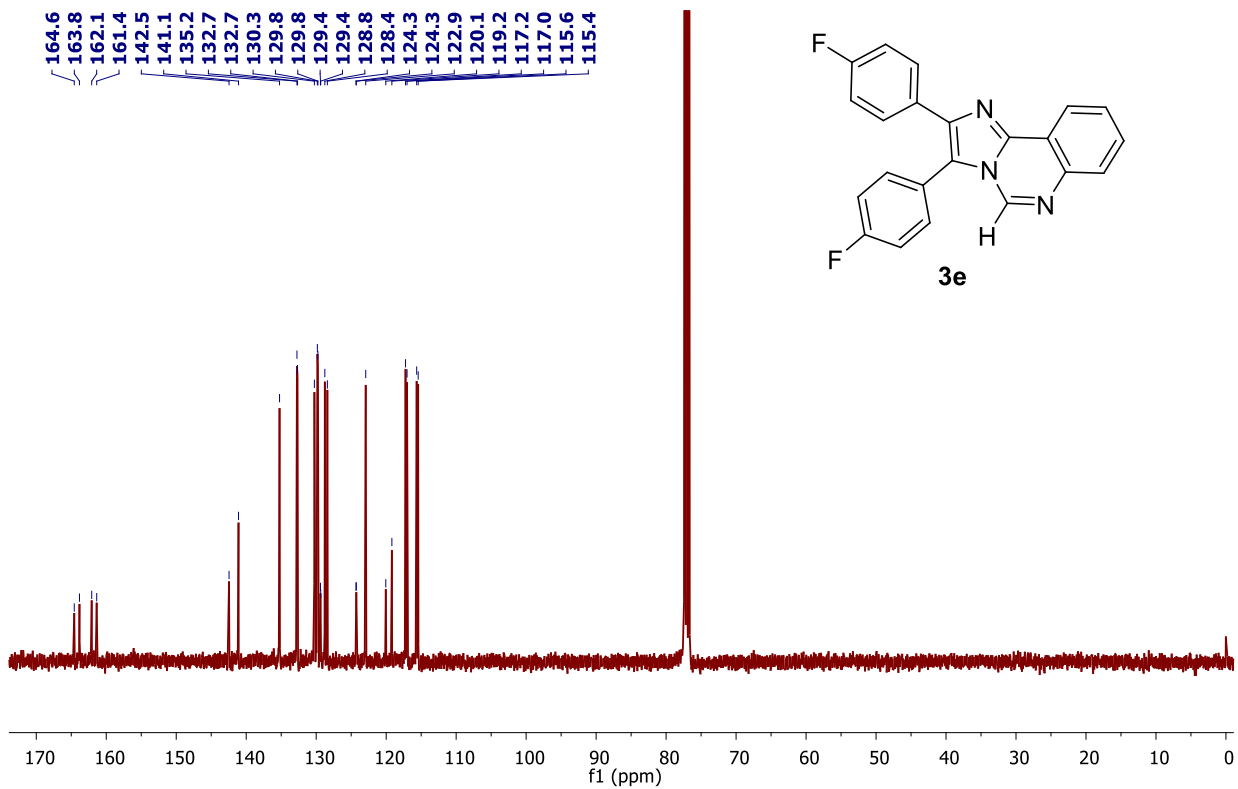

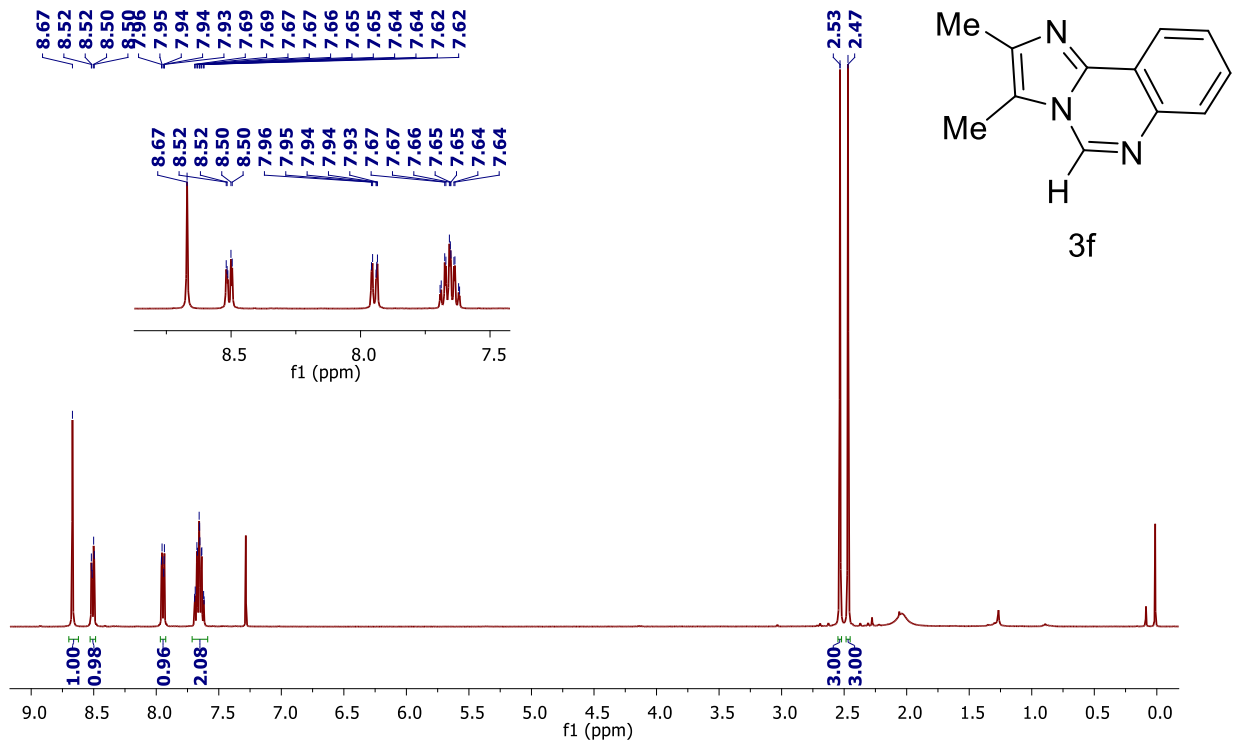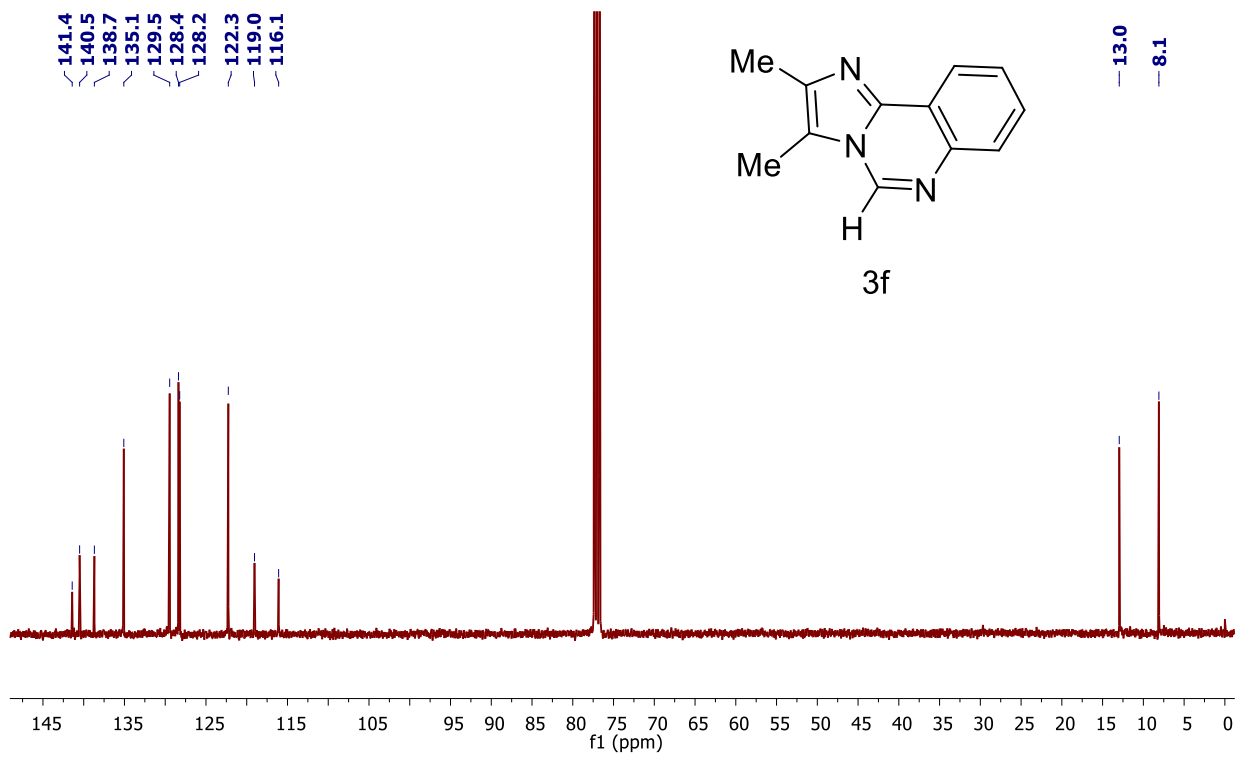

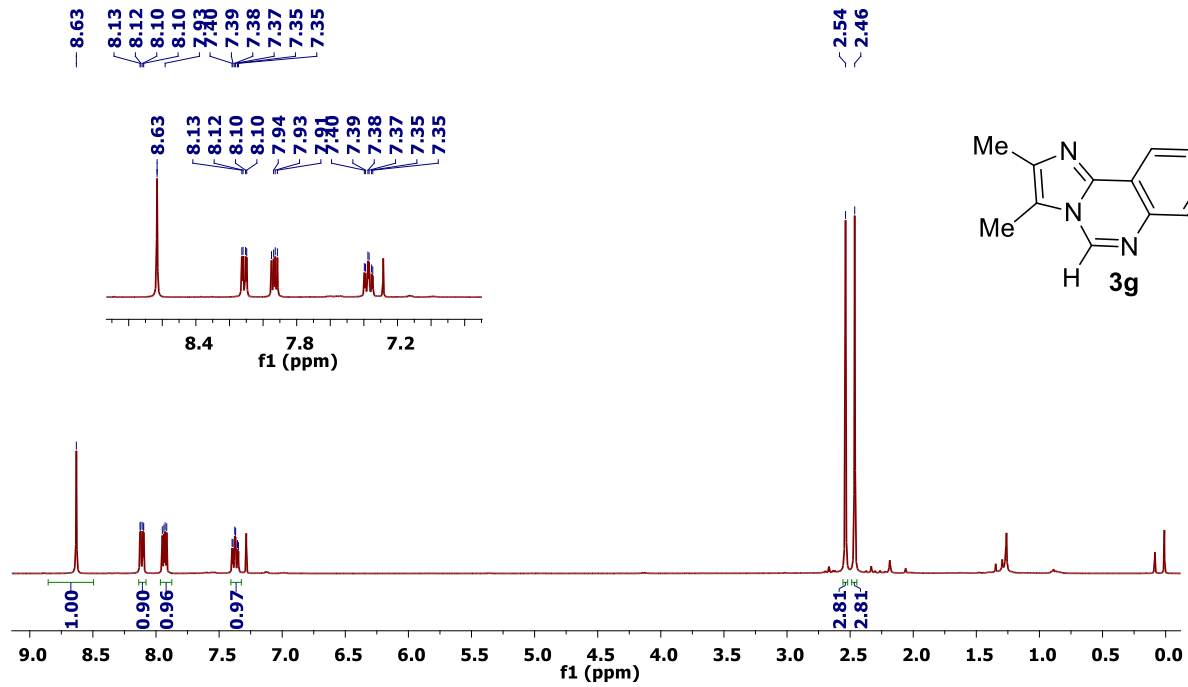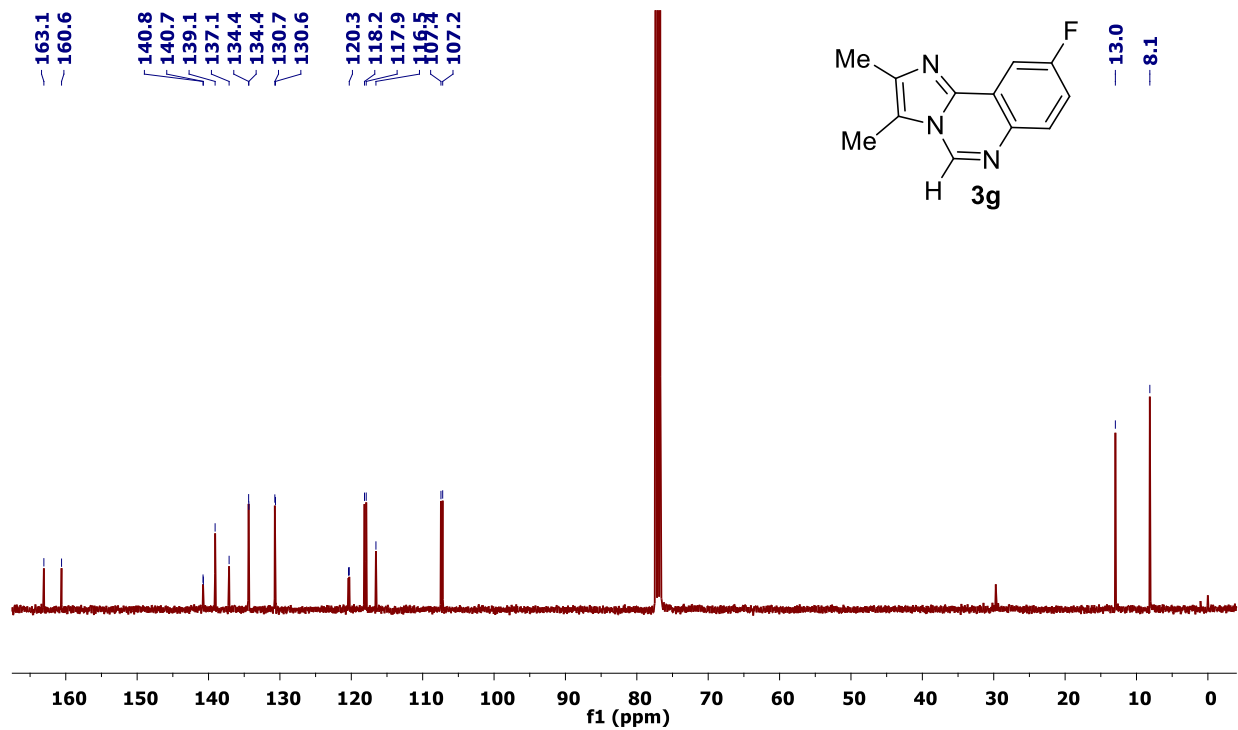



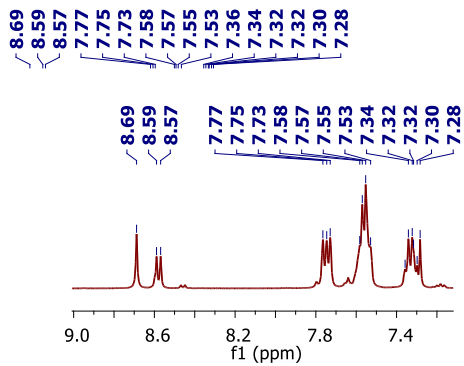

2.60

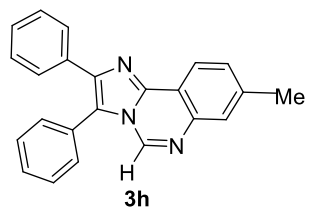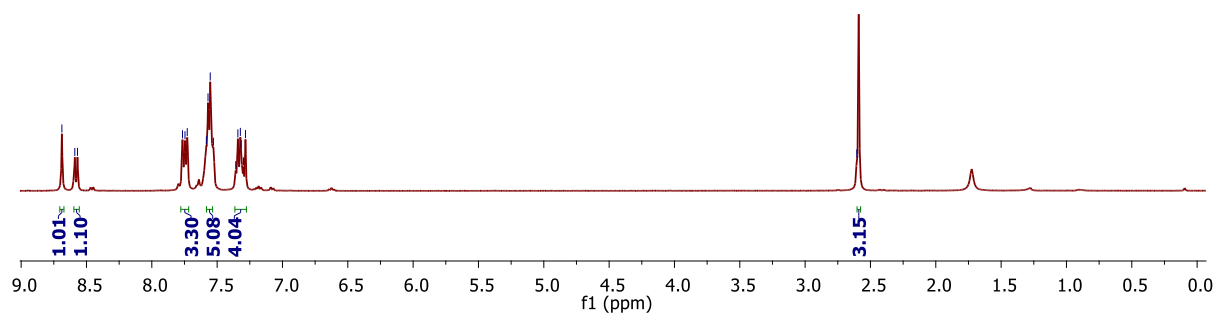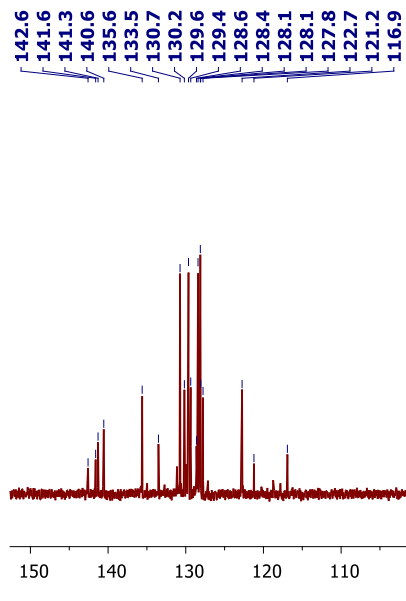

21.6

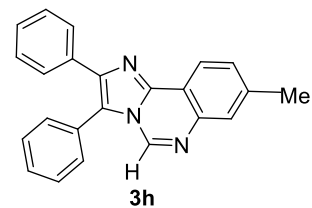

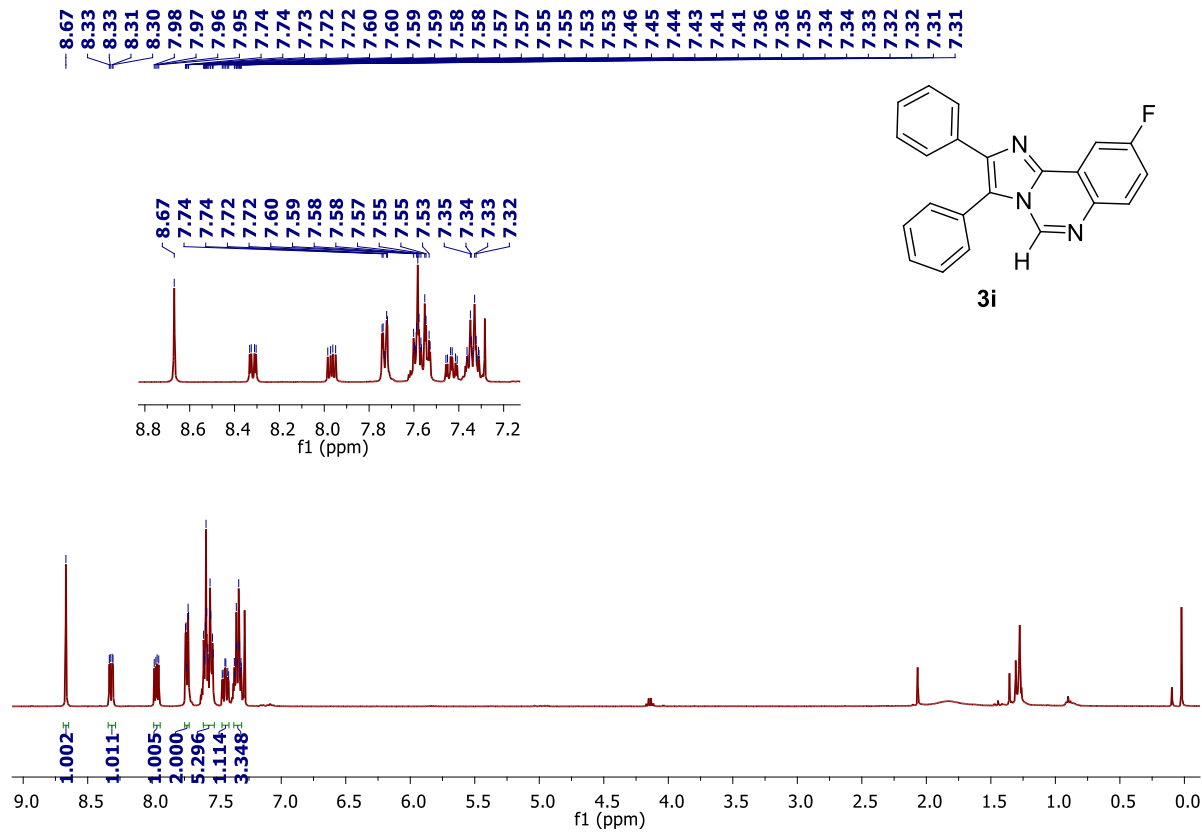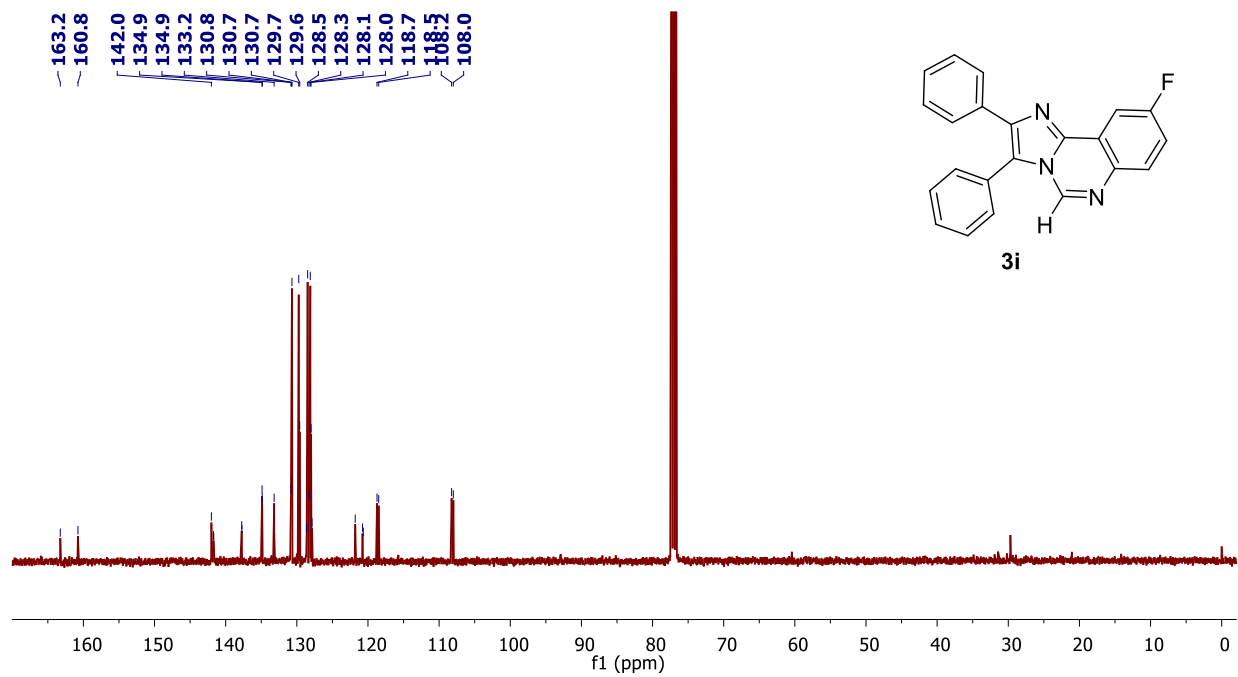

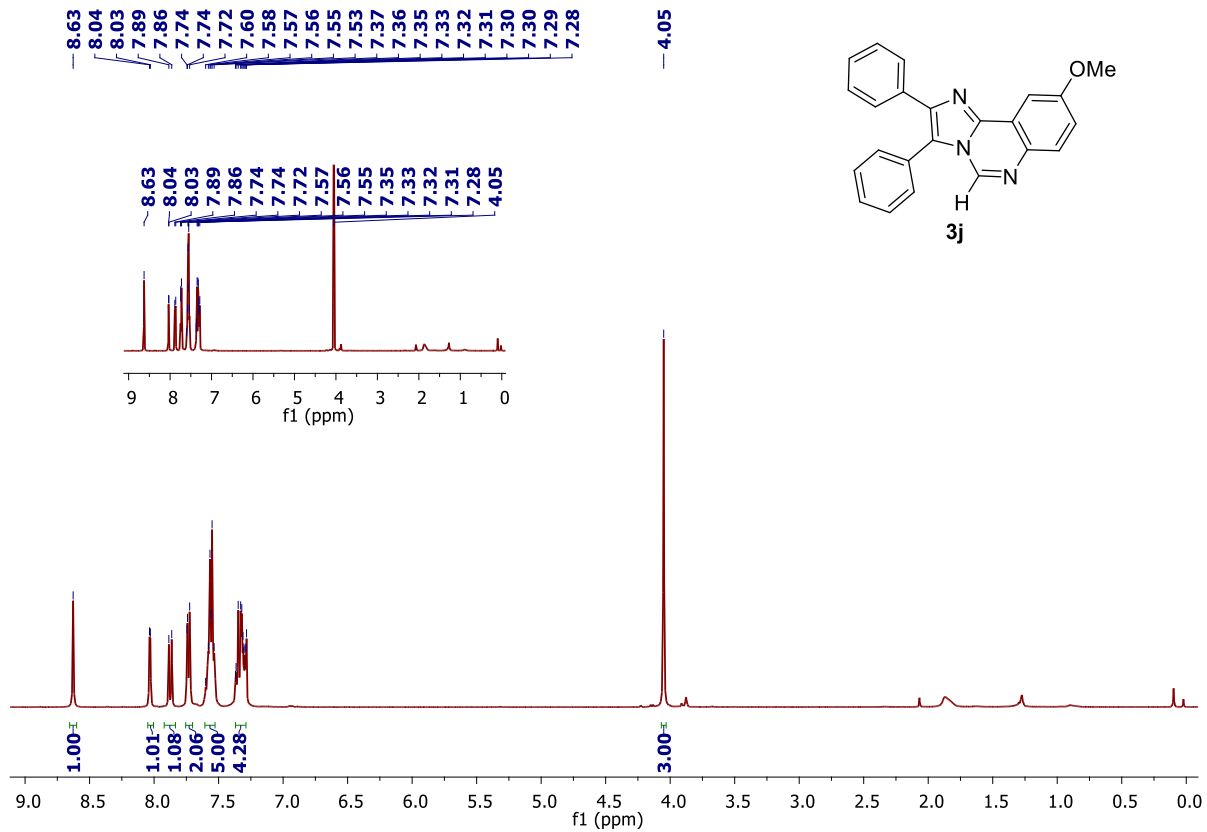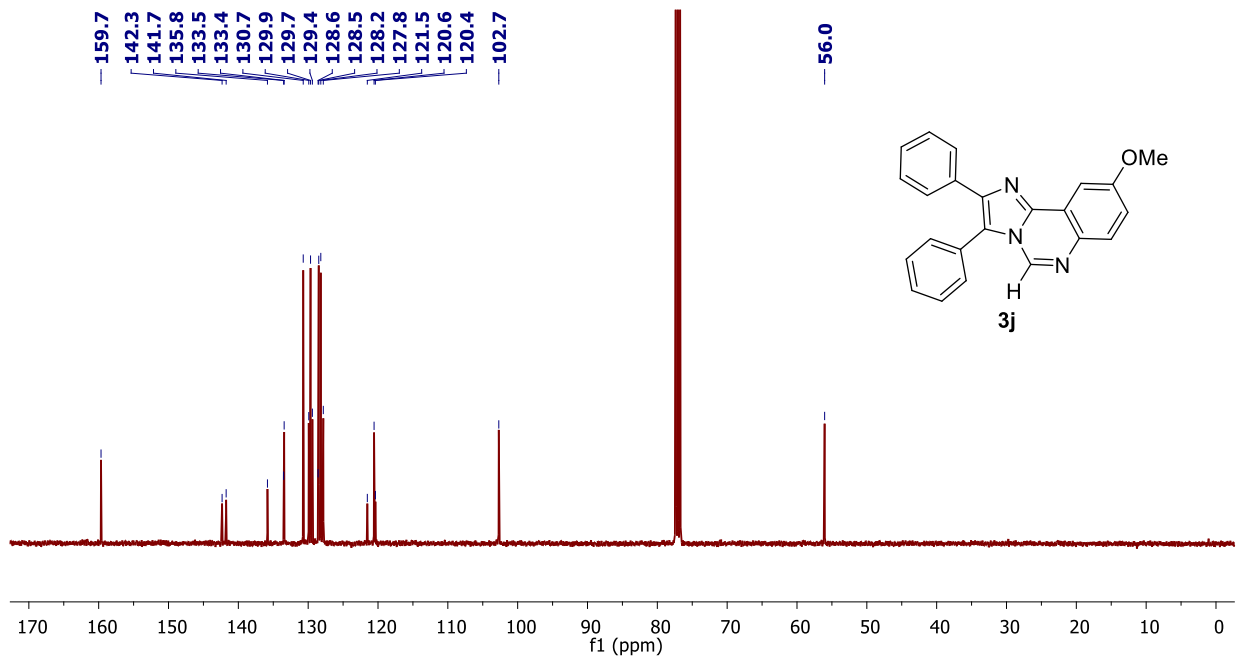

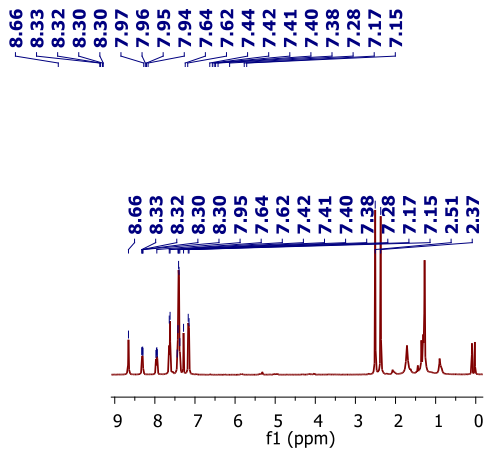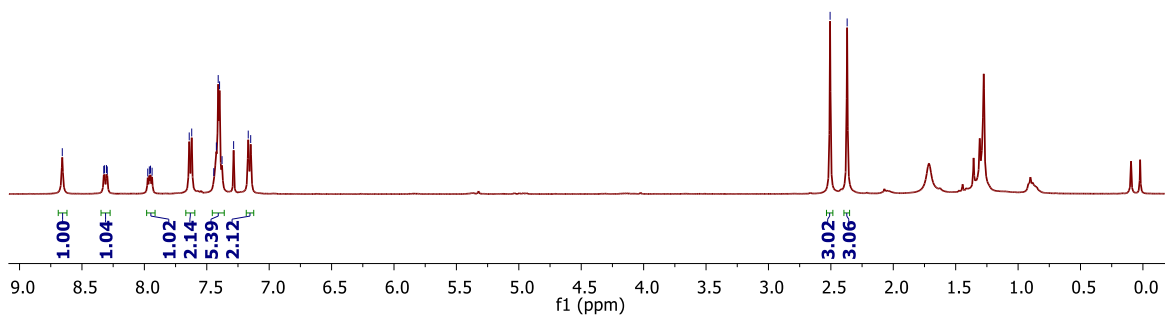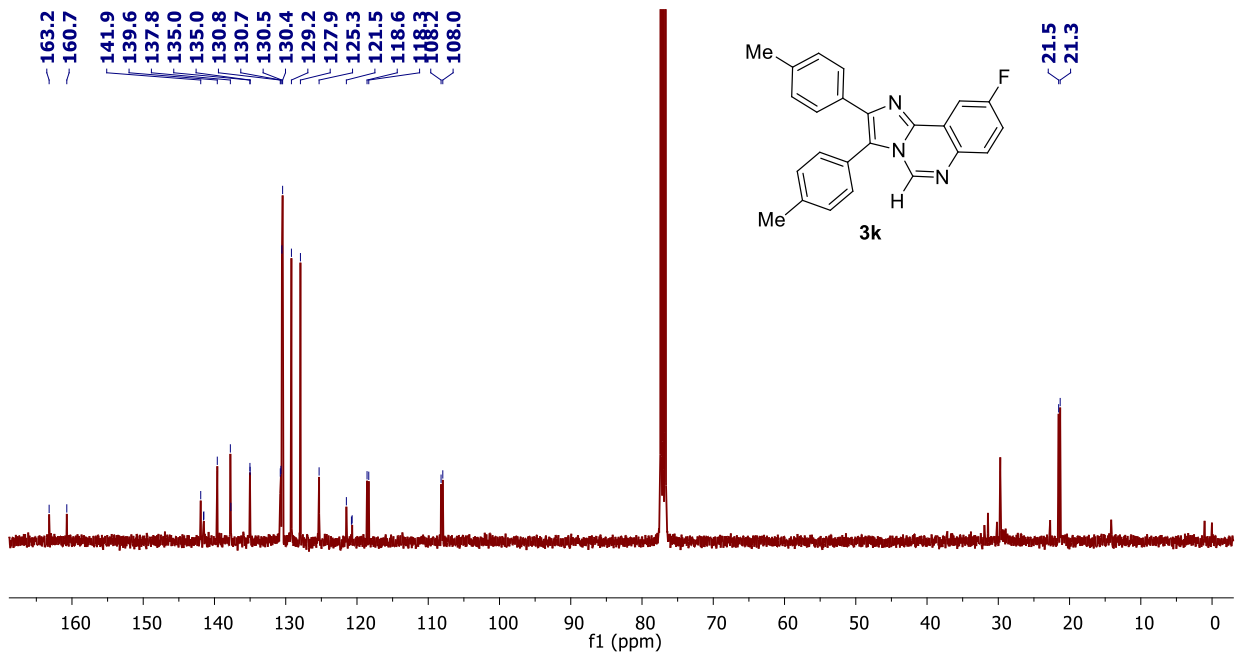

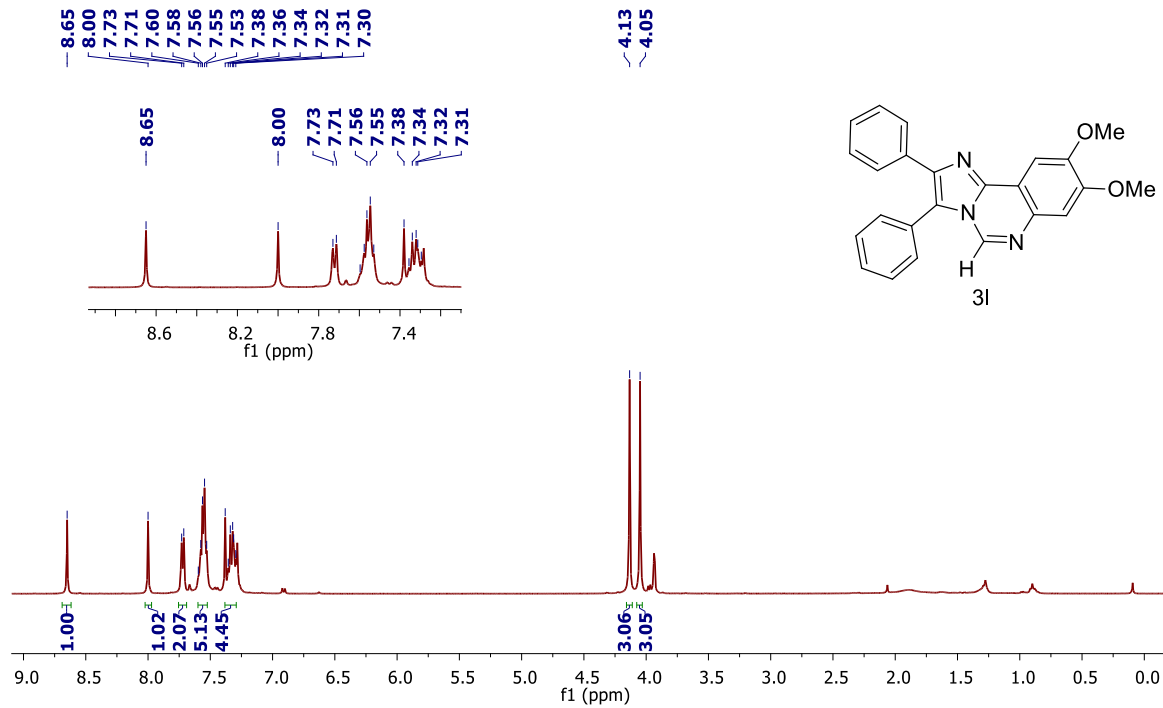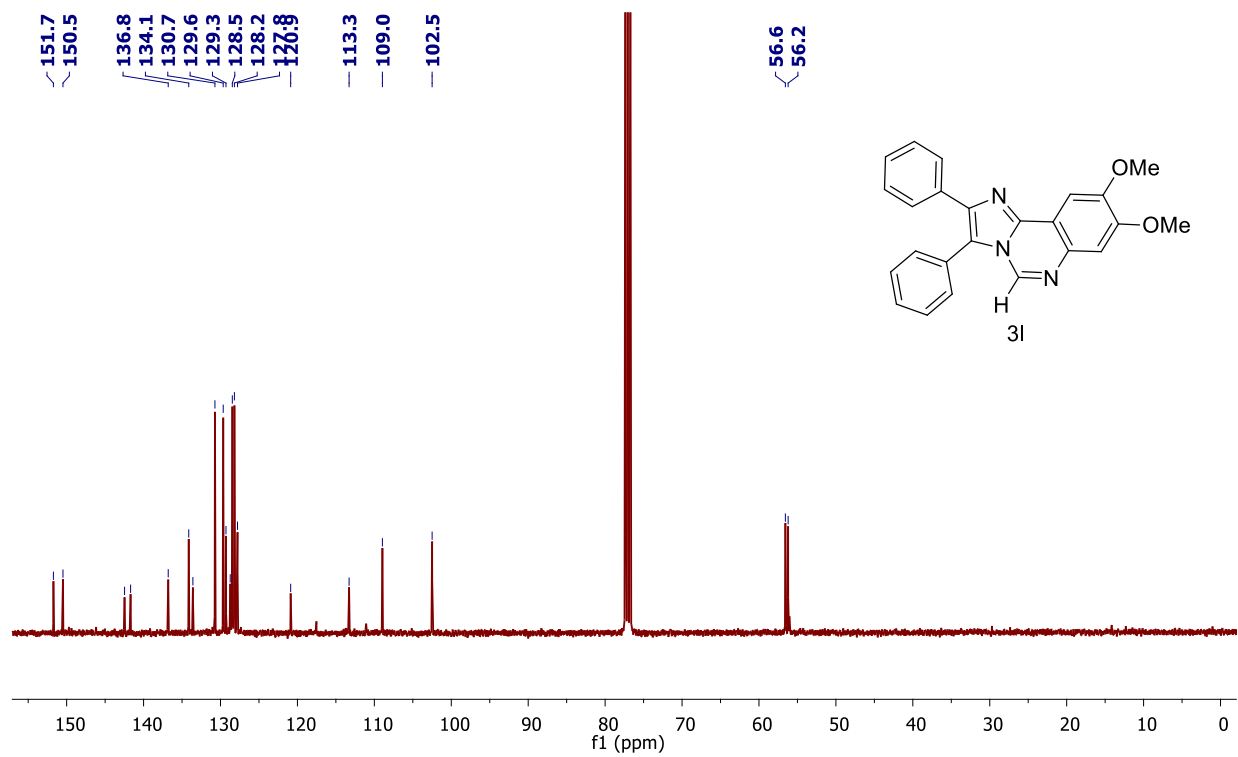

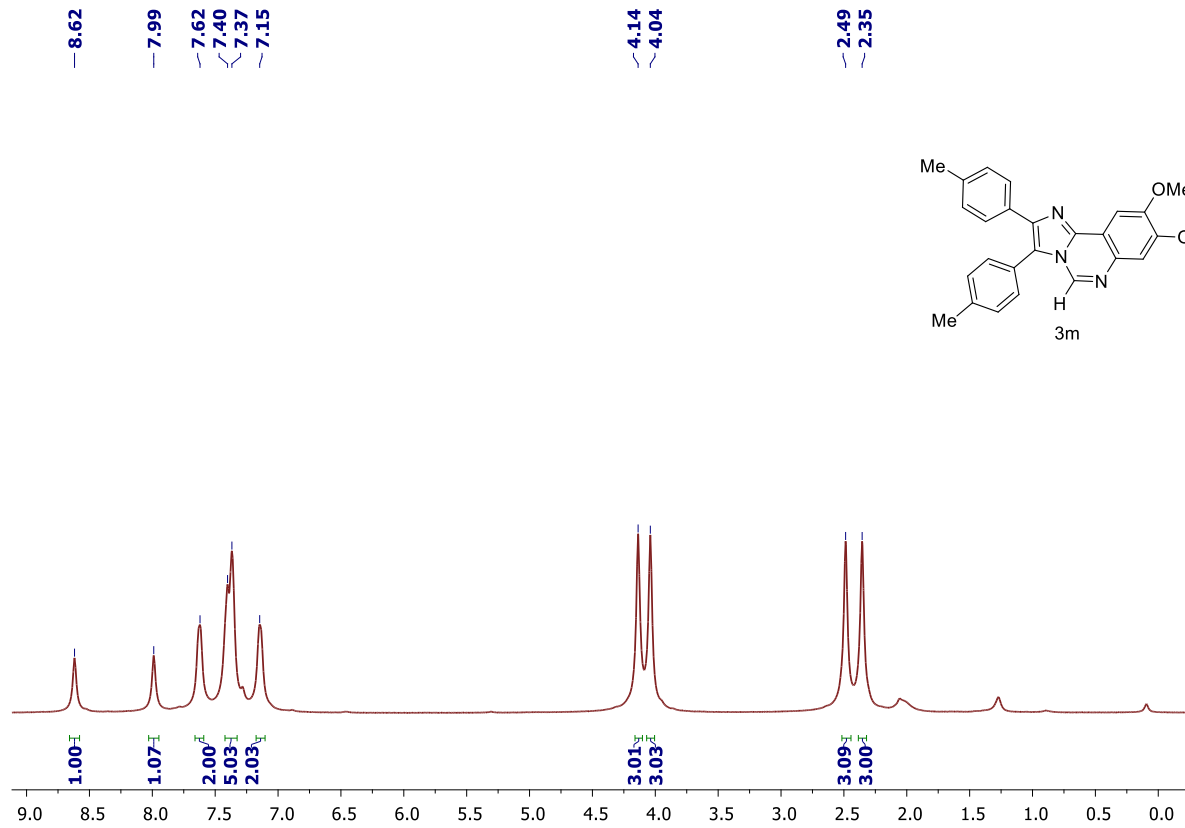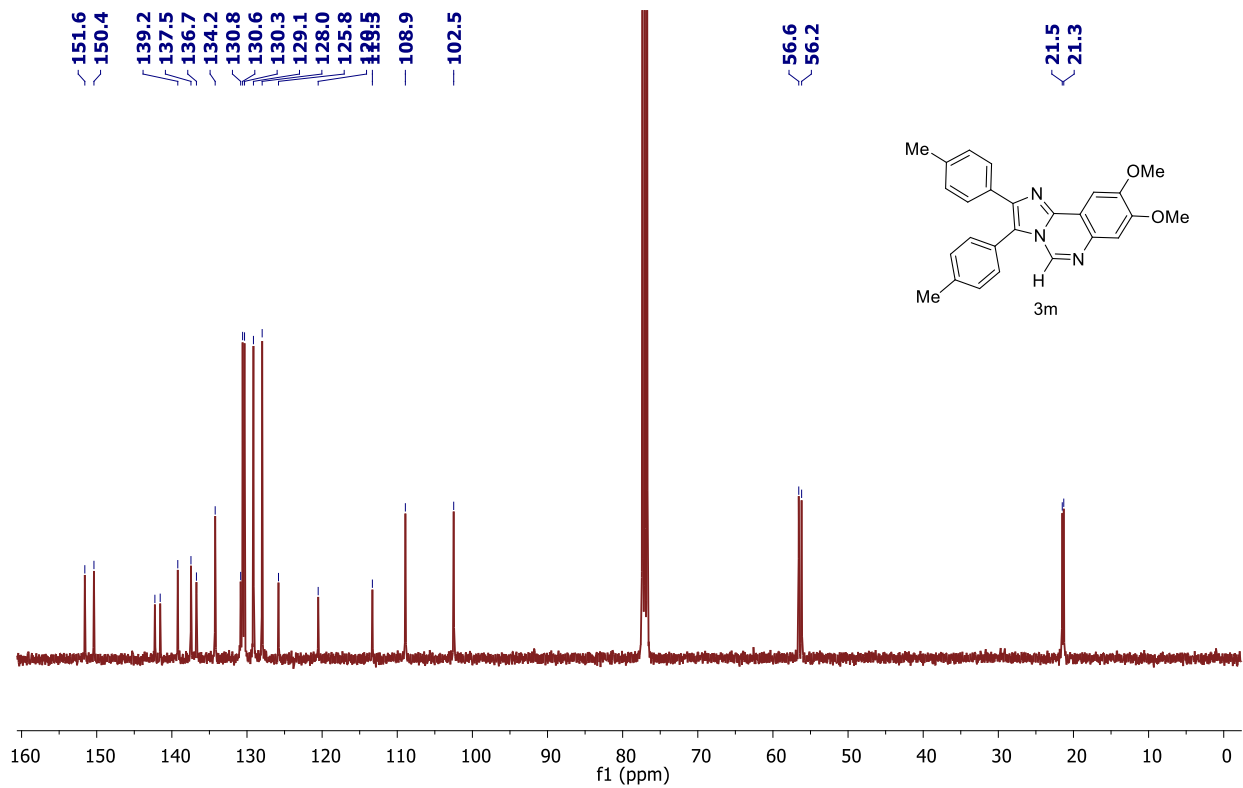

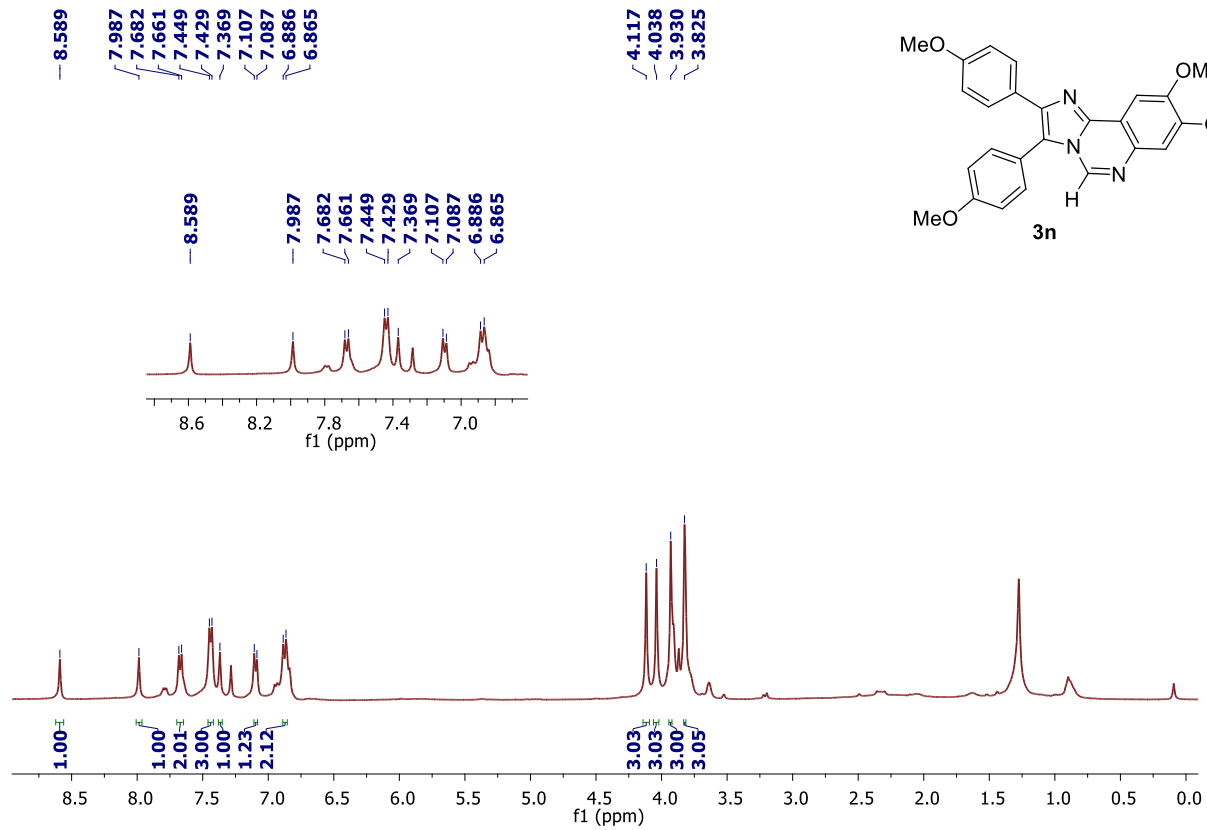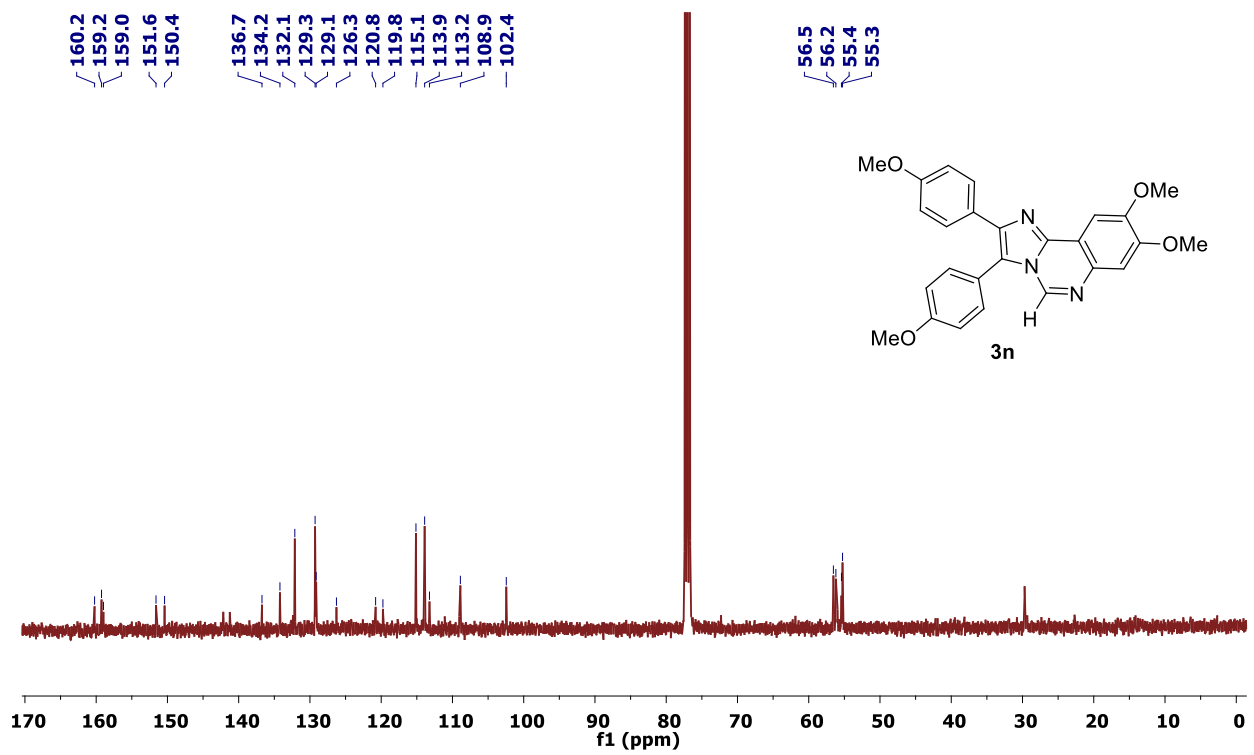

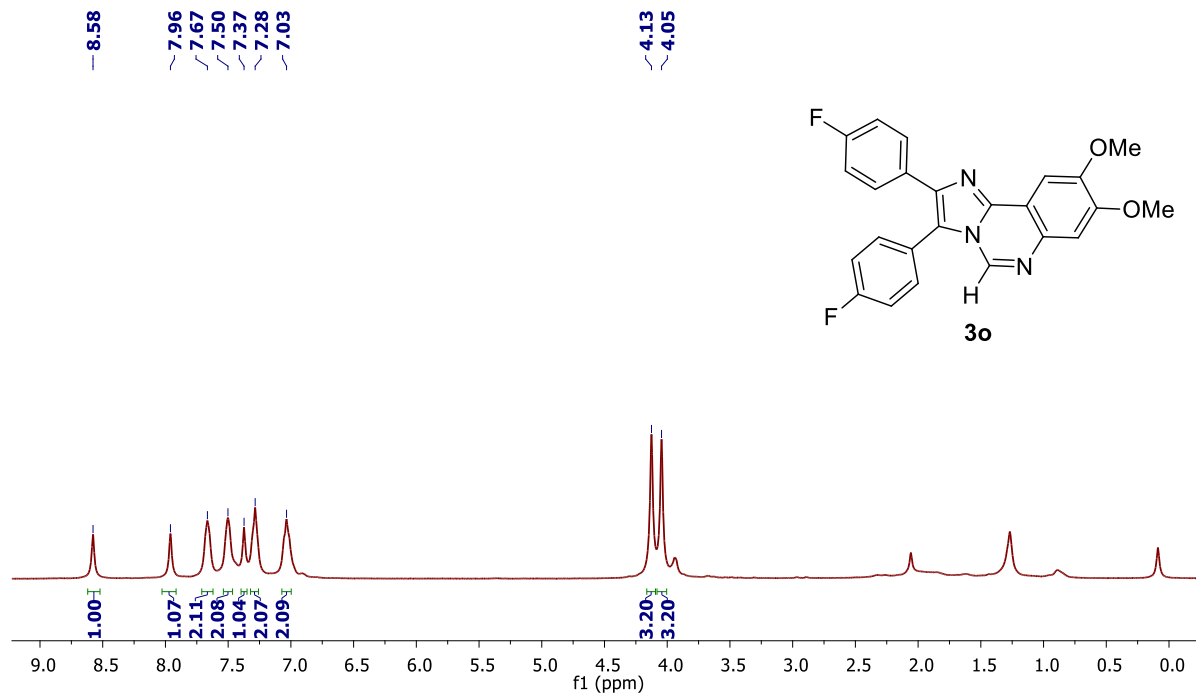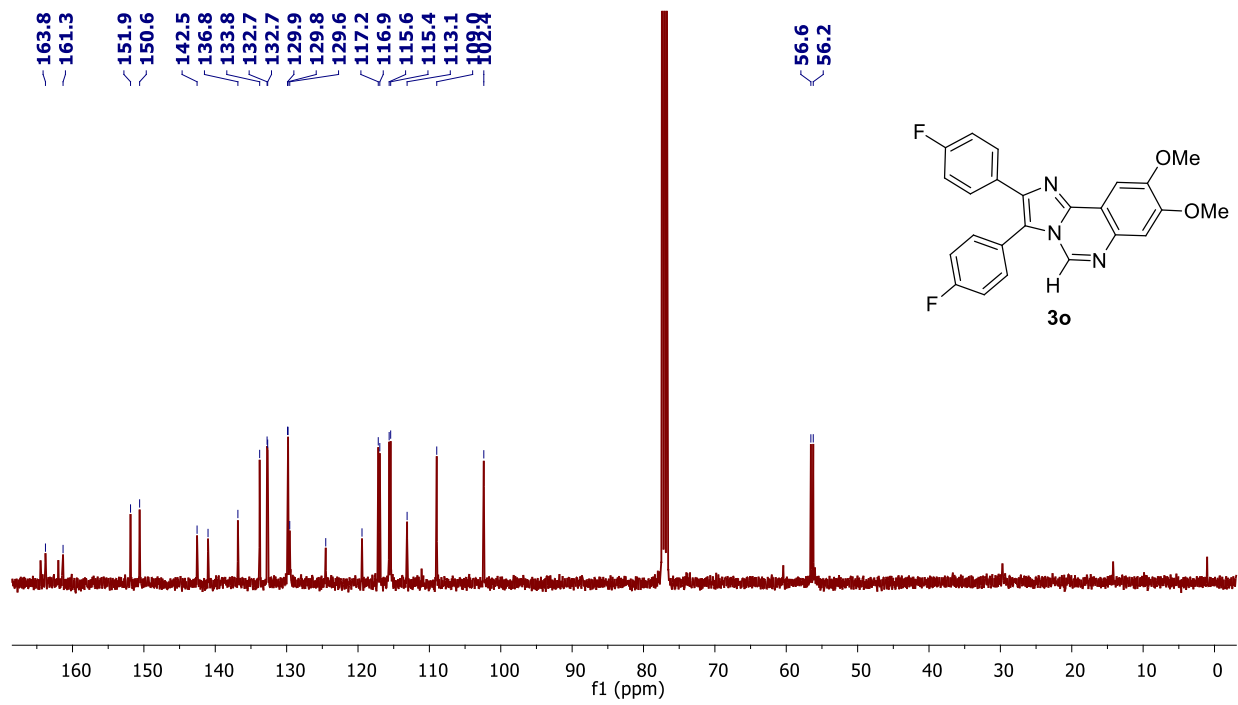



8.61  
8.30  
8.29  
8.28  
8.27  
7.99  
7.98  
7.97  
7.96  
7.69  
7.68  
7.67  
7.66  
7.53  
7.52  
7.51  
7.67  
7.66  
7.66  
7.53  
7.53  
7.52  
7.51  
7.50  
7.50  
7.47  
7.46  
7.45  
7.44  
7.43  
7.42  
7.33  
7.33  
7.31  
7.29  
7.29  
7.28  
7.07  
7.05  
7.03

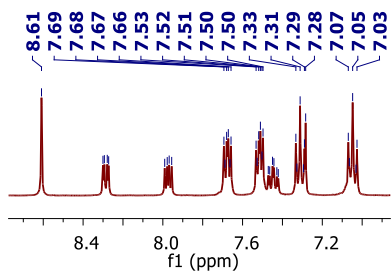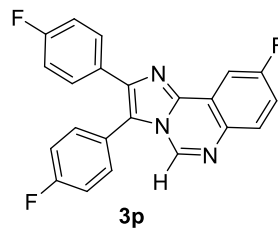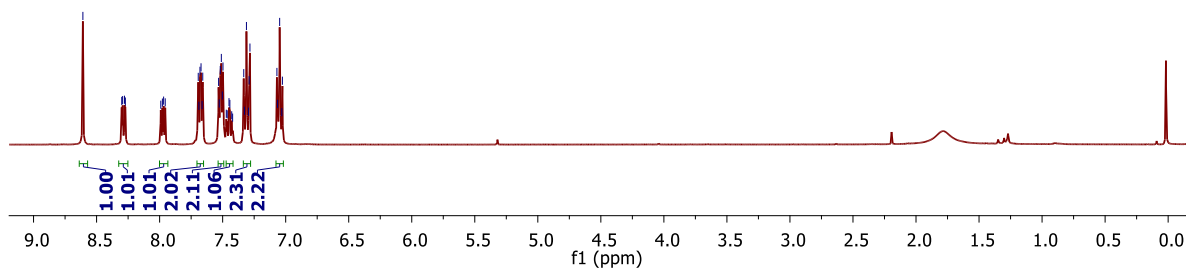

164.6  
163.9  
163.3  
162.1  
161.4  
160.8  
134.5  
134.5  
132.7  
132.6  
130.9  
130.8  
129.8  
129.7  
118.7  
117.3  
117.1  
115.7  
108.5  
107.9

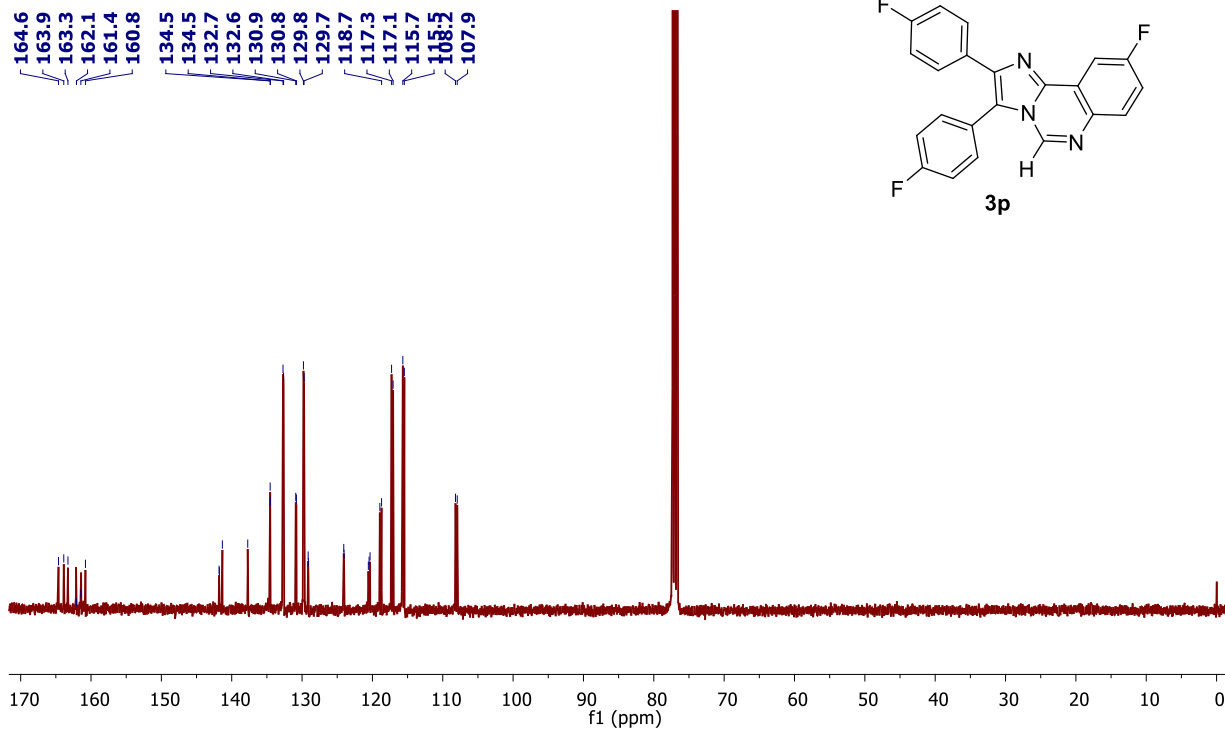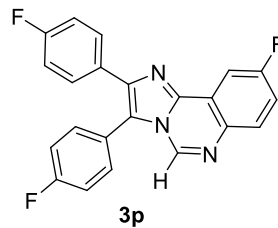

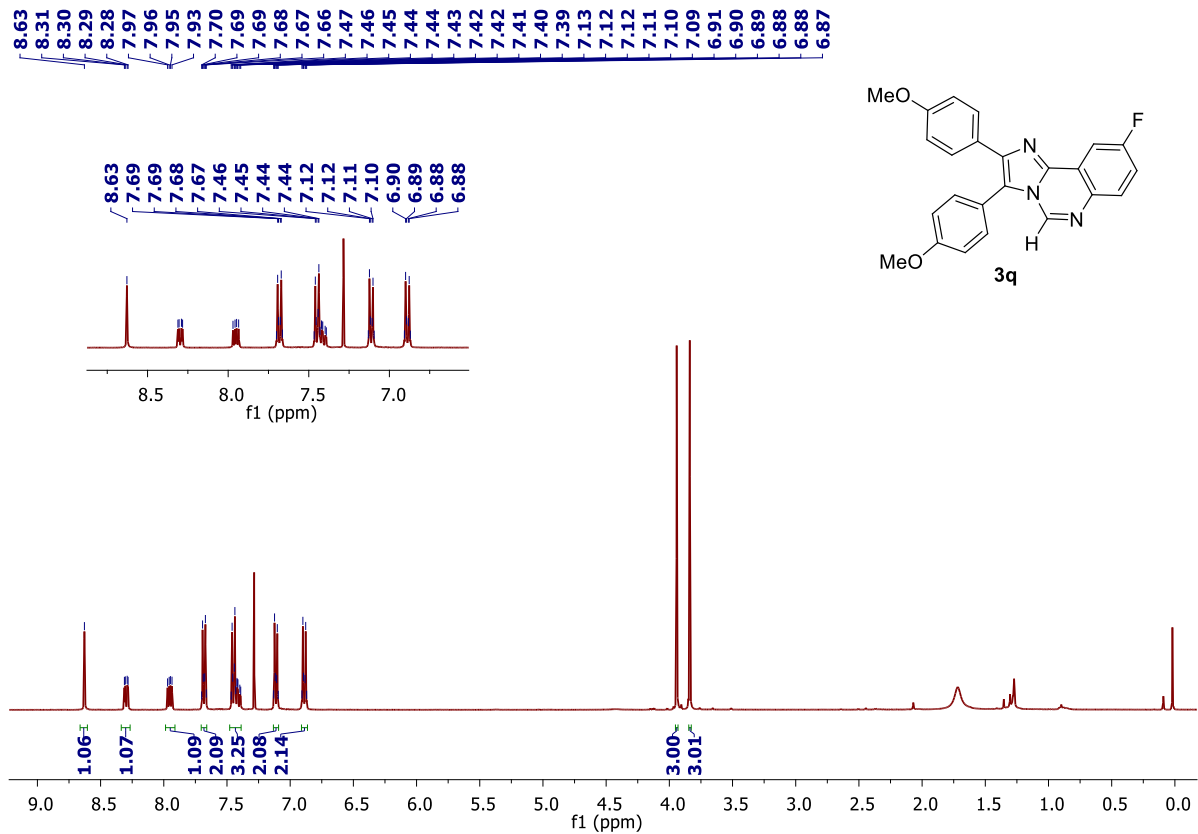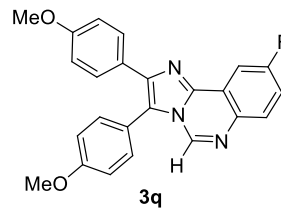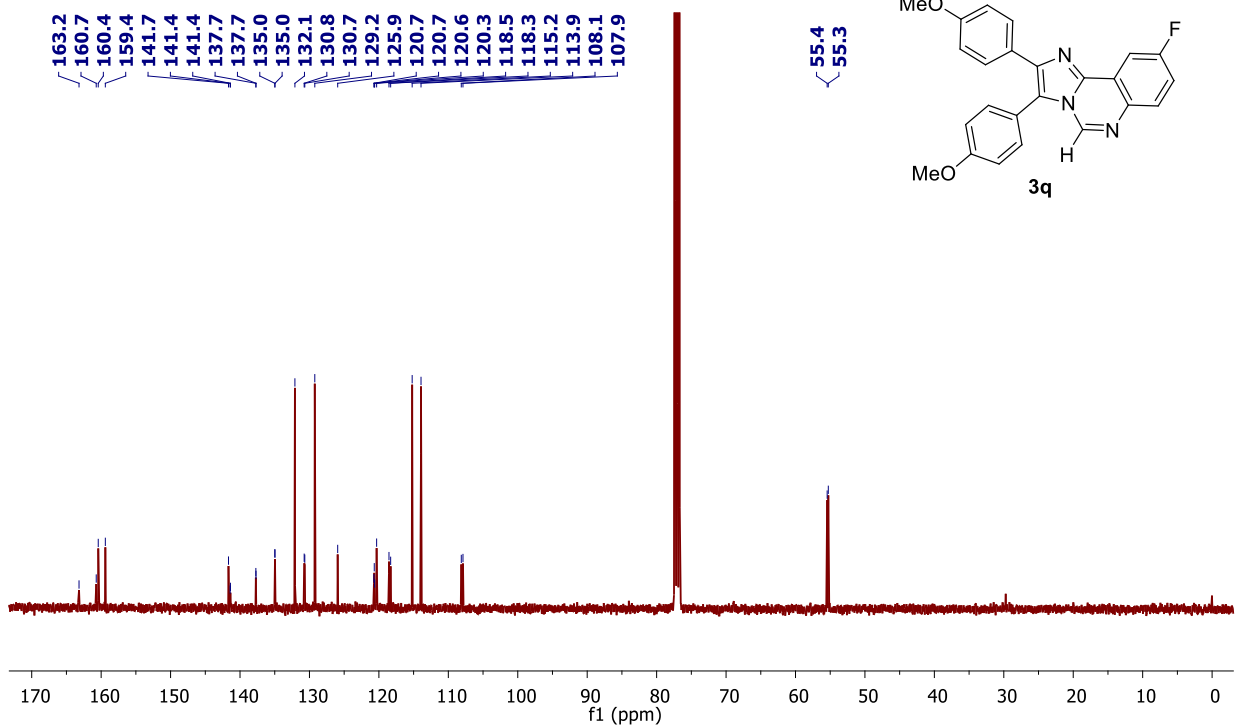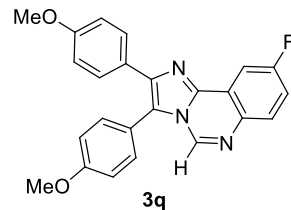

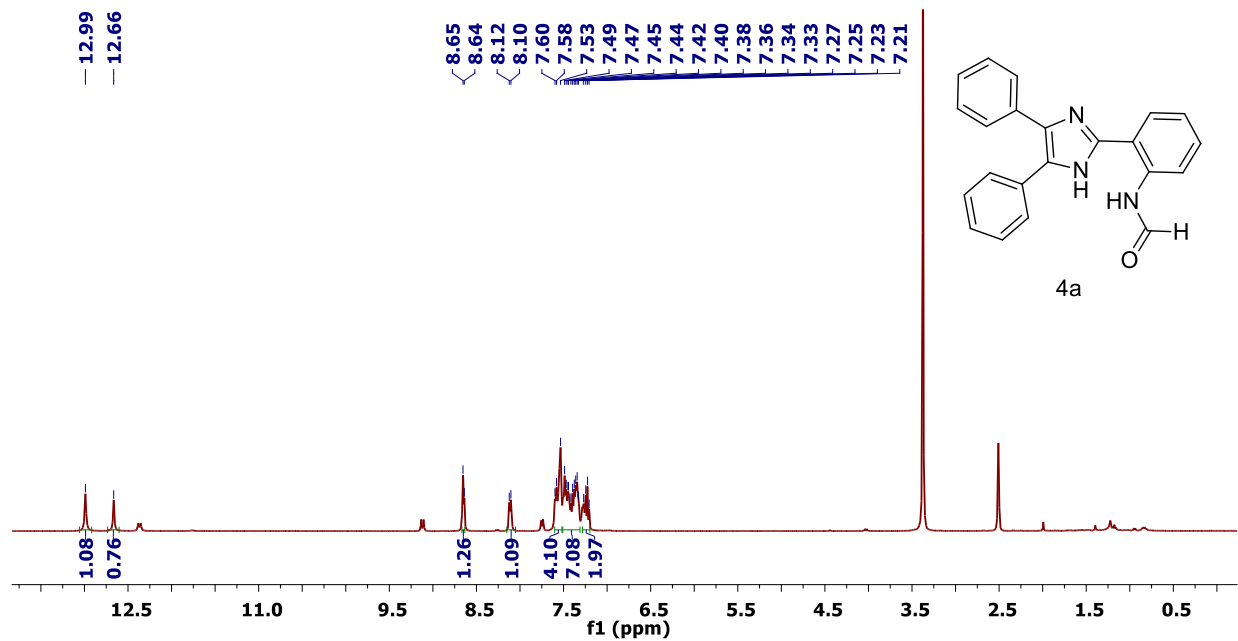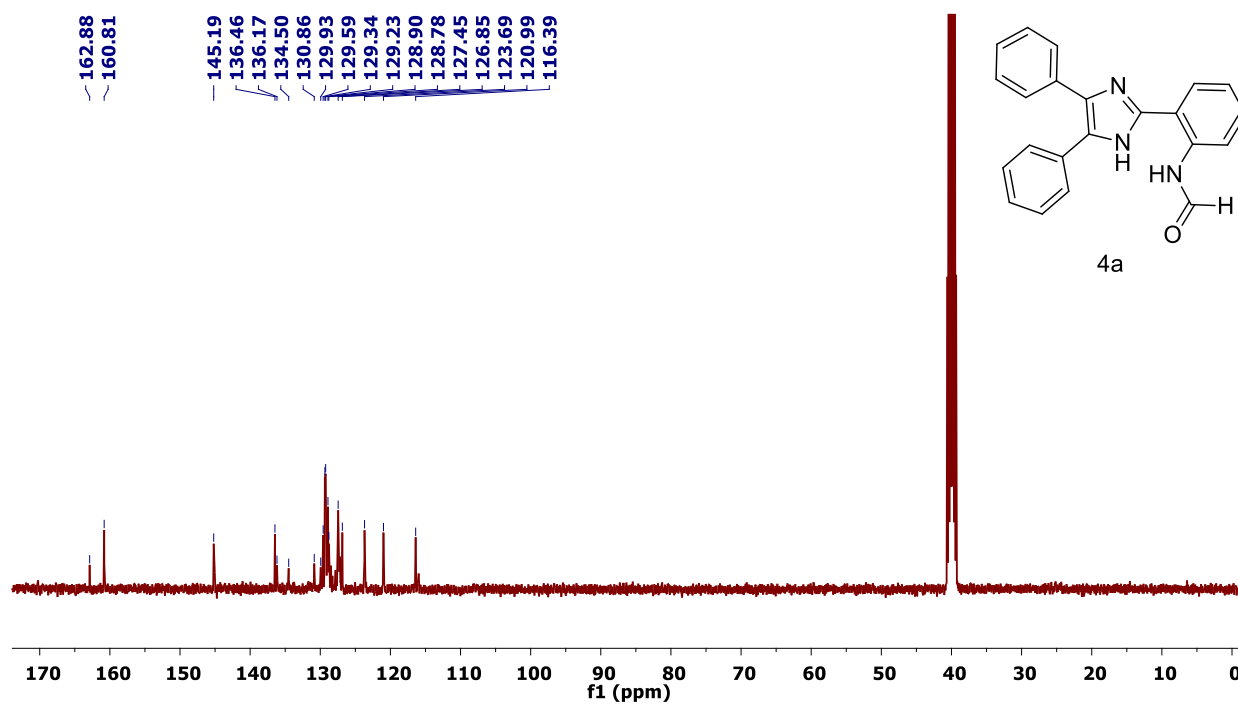

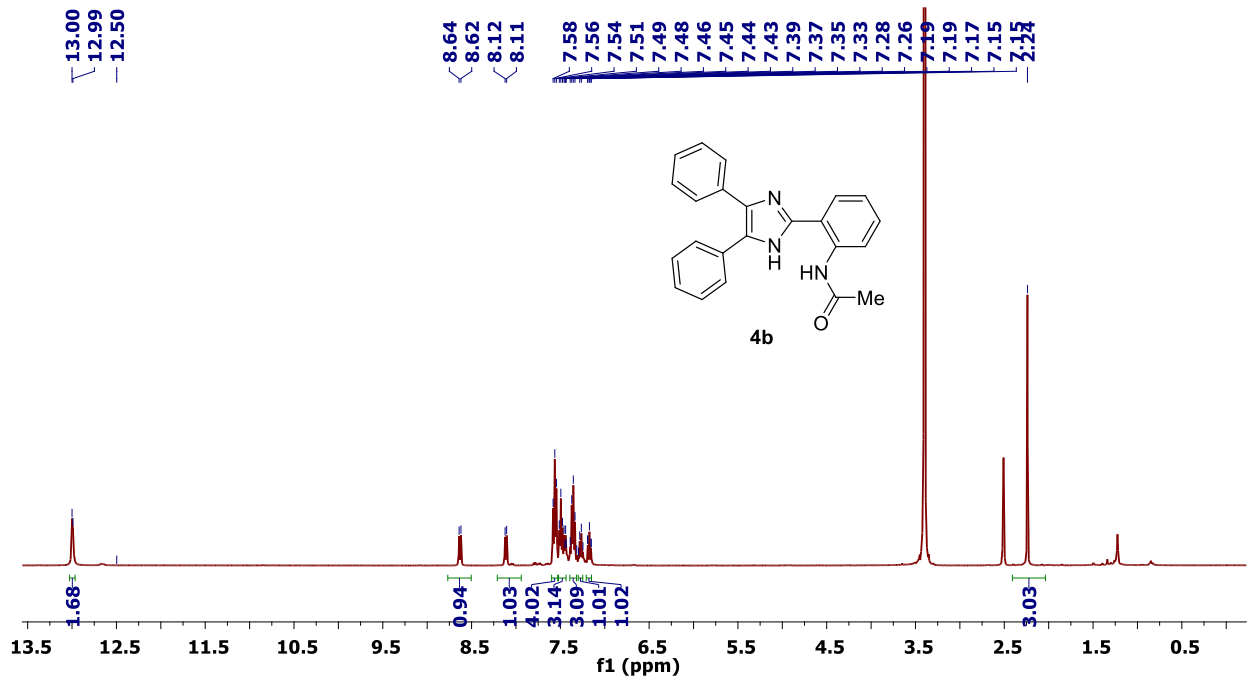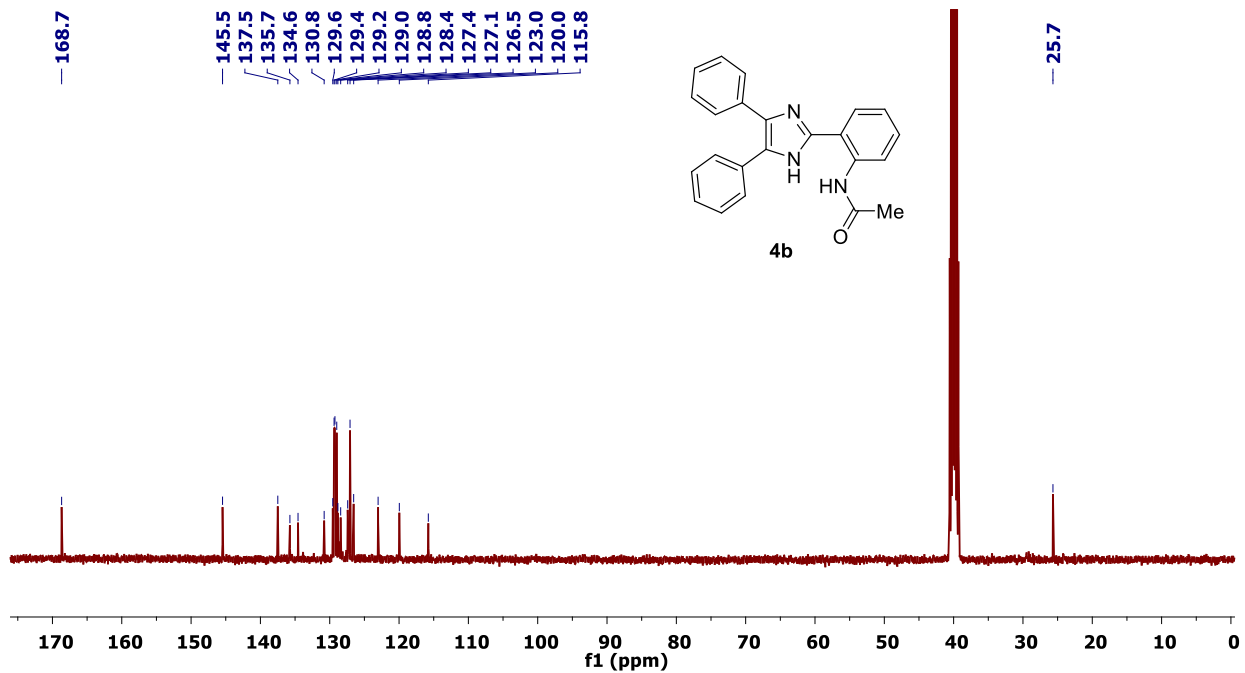

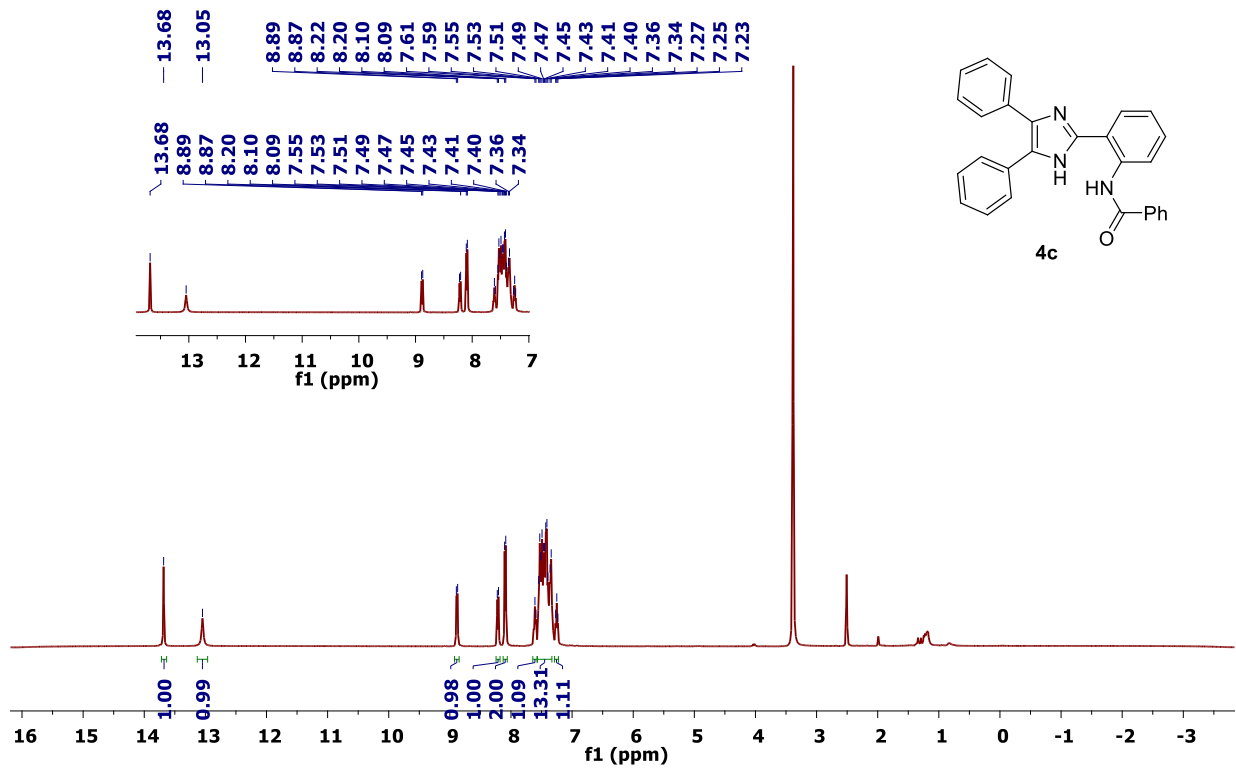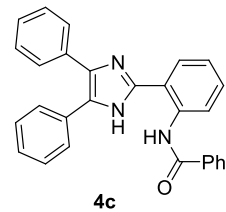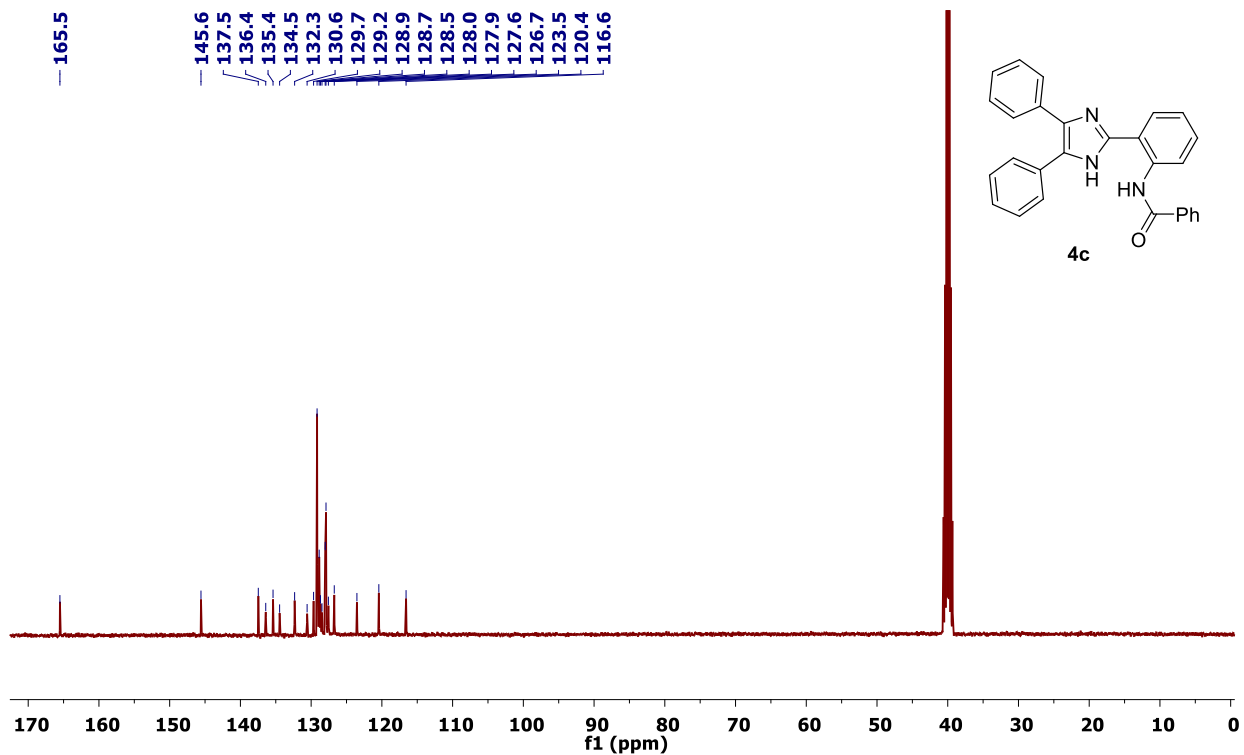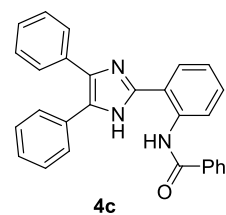

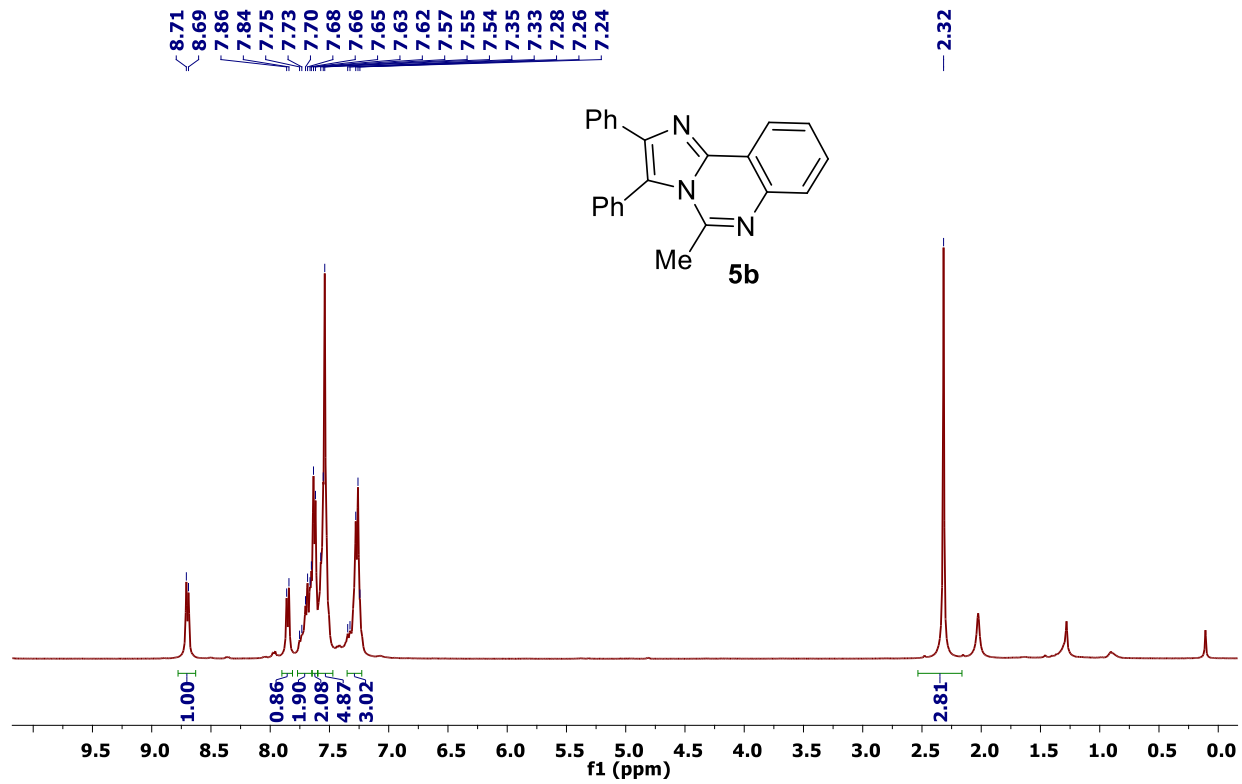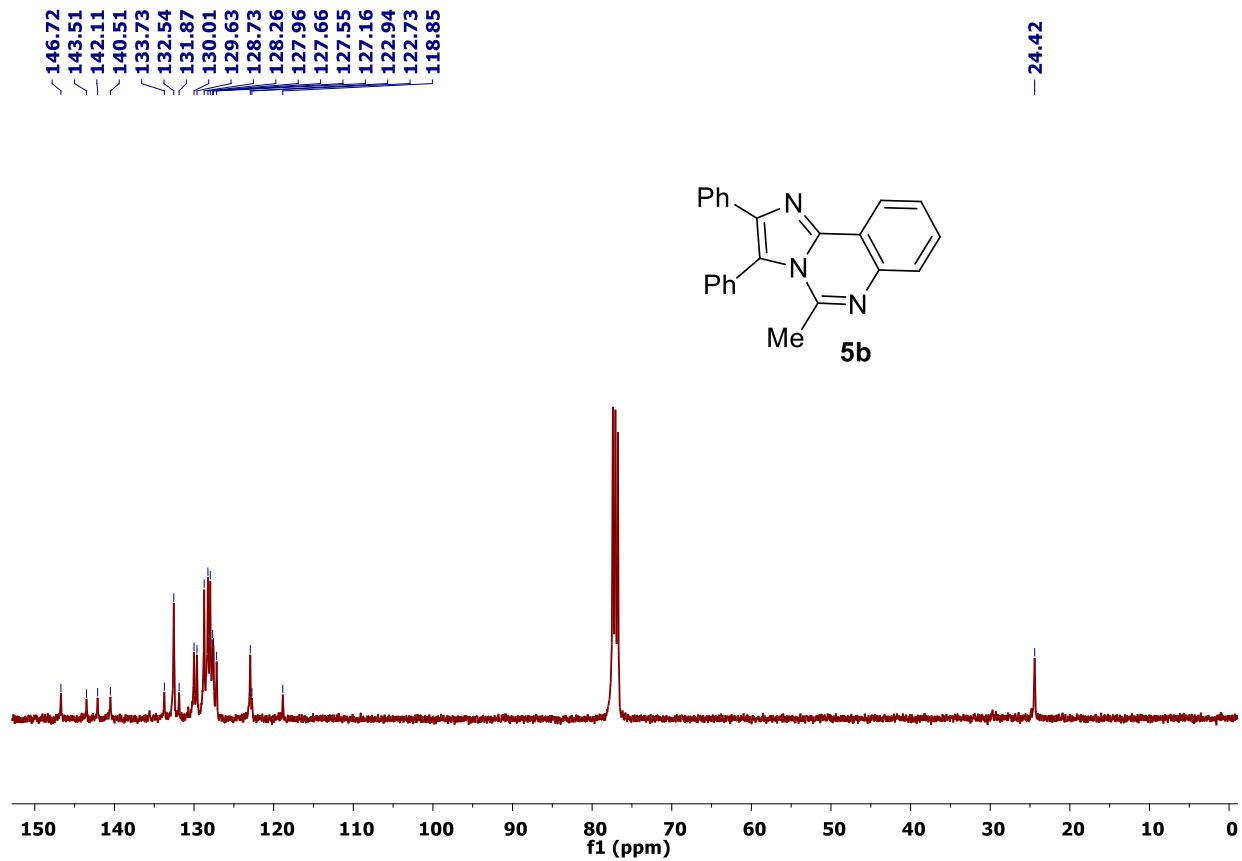

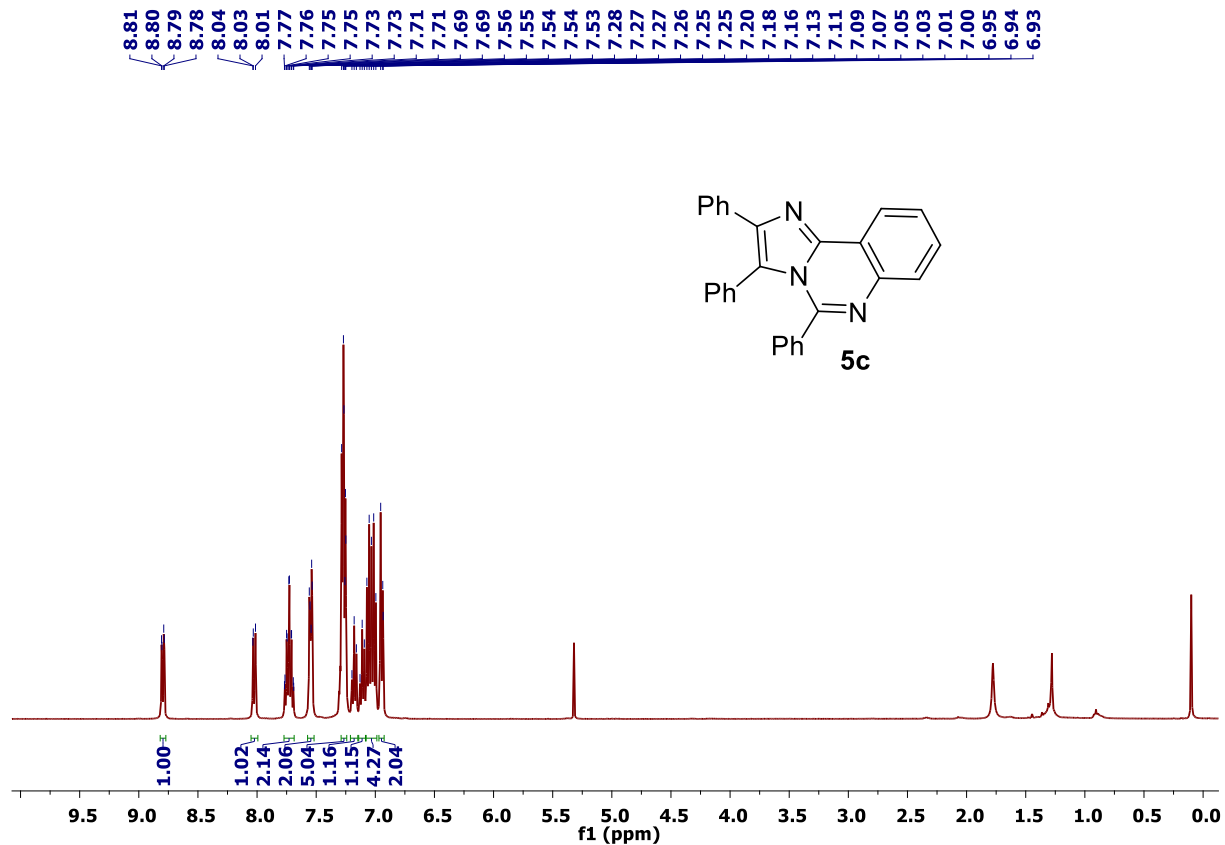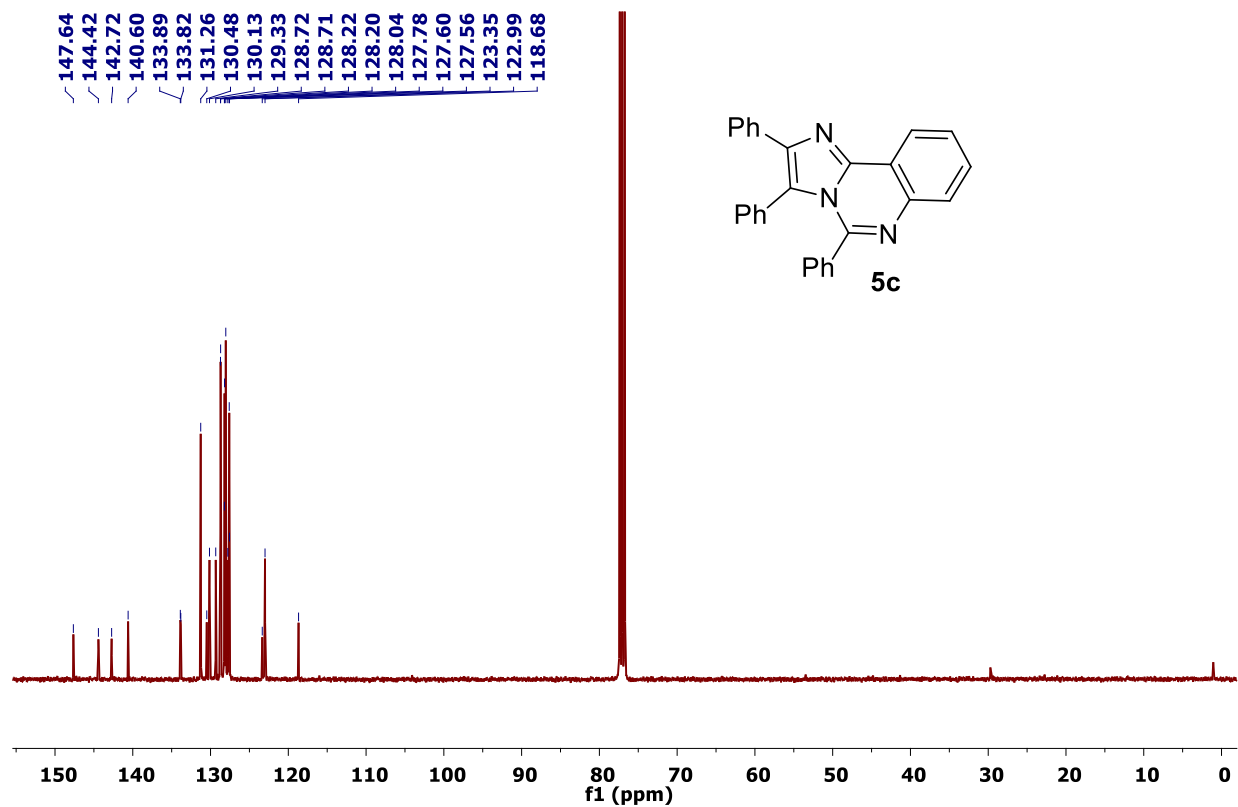

Supplement: c5ob02469b1.pdf [file c5ob02469b1.pdf]
